# Supplementary material for: PpF: a density functional fine-tuned for noncovalent interactions of protein and peptide residues
Source: Royal Society of Chemistry journal article supplement (doi:10.1039/d6sc01551d), 2026-06-04
Supplement: d6sc01551d1.pdf [file d6sc01551d1.pdf]

ELECTRONIC SUPPLEMENTARY INFORMATION

**PpF: A Density Functional Fine-Tuned for Noncovalent Interactions of Protein and Peptide Residues**

Yini Zhou,<sup>a,b</sup> Tao Li,<sup>a,b</sup> Yaqi Li,<sup>a,b</sup> Jianda Yue,<sup>a,b</sup> Qifeng Tian,<sup>a,b</sup> Donald G. Truhlar,<sup>c</sup> Zhonghua Liu<sup>\*a,b</sup> and Ying Wang<sup>\*a,b</sup>

*<sup>a</sup>The National and Local Joint Engineering Laboratory of Animal Peptide Drug Development, College of Life Sciences, Hunan Normal University, Changsha, 410006, Hunan, China*

*<sup>b</sup>Peptide and Small Molecule Drug R&D Platform, Furong Laboratory, Hunan Normal University, Changsha, 410081, Hunan, China*

*<sup>c</sup>Department of Chemistry, Chemical Theory Center, and Minnesota Supercomputing Institute, University of Minnesota, Minneapolis, MN 55455-0431, USA*

\* Corresponding authors: liuzh@hunnu.edu (Z. Liu), wangyin@hunnu.edu.cn (Y. Wang)

## Contents

|                                                                                                                                                   |      |
|---------------------------------------------------------------------------------------------------------------------------------------------------|------|
| Supplementary Table S1. Optimized parameters of PpF.                                                                                              | S-3  |
| Supplementary Table S2. Training sets and the final inverse weights.                                                                              | S-4  |
| Supplementary Table S3. Functionals compared in this work.                                                                                        | S-8  |
| Supplementary Table S4. Interaction energies (kcal/mol) of the amino-acid pair training and test set for 28 functionals and the reference method. | S-10 |
| Supplementary Table S5. MUEs (kcal/mol) of 28 functionals for the amino-acid pair training set and test set.                                      | S-18 |
| Supplementary Table S6. Mean MUEs (kcal/mol) of 28 functionals for the amino-acid pair training set and test set.                                 | S-26 |
| Supplementary Table S7. Computational time (single-core CPU) for 22 functionals on the ALA-VAL residue pair system.                               | S-27 |
| Supplementary Table S8. Interaction energies (kcal/mol) of 260 amino-acid pair systems calculated with the PpF functional.                        | S-28 |
| Supplementary Table S9. MUEs (kcal/mol) of 23 functionals for the SCAI dataset.                                                                   | S-33 |
| Supplementary Table S10. MUEs (kcal/mol) of 24 functionals for the 4 datasets of JSCH database.                                                   | S-34 |
| Supplementary Table S11. MUEs (kcal/mol) of 28 functionals for the 35 datasets of MGCDB84_NC database.                                            | S-36 |
| Supplementary Table S12. MUEs (kcal/mol) of 38 functionals for the 55 datasets of GMTKN55 database.                                               | S-44 |
| References                                                                                                                                        | S-68 |

**Supplementary Table S1. The optimized parameters of PpF.** The parameters shown in the table correspond to  $X$  in equation (1),  $a_{ijk}$  in equation (2),  $b_i$  and  $c_i$  in equation (3), and  $S_{r,6}$  in equation (5).

| Nonseparable terms |              |           |              | Correlation terms |              |
|--------------------|--------------|-----------|--------------|-------------------|--------------|
| $a_{000}$          | 0.299938742  | $a_{102}$ | -0.478206219 | $b_0$             | 0.847844158  |
| $a_{001}$          | -0.172177576 | $a_{103}$ | 0.175131824  | $b_1$             | -0.446743709 |
| $a_{002}$          | -0.230713056 | $a_{104}$ | -0.78214315  | $b_2$             | 2.651157441  |
| $a_{003}$          | 0.02832559   | $a_{110}$ | -2.594696308 | $b_3$             | -0.40206795  |
| $a_{004}$          | 0.772464711  | $a_{111}$ | 2.485383353  | $b_4$             | -4.375100339 |
| $a_{005}$          | 0.597848025  | $a_{112}$ | 2.155460062  | $b_5$             | -0.870229495 |
| $a_{010}$          | 1.721784595  | $a_{113}$ | 2.453851081  | $b_6$             | -1.100915595 |
| $a_{011}$          | -1.982181999 | $a_{120}$ | 2.335456849  | $b_7$             | -3.309440201 |
| $a_{012}$          | -4.989794582 | $a_{121}$ | -1.078985645 | $b_8$             | 5.210543232  |
| $a_{013}$          | 0.370783141  | $a_{122}$ | 1.584827496  |                   |              |
| $a_{014}$          | 0.551650128  | $a_{200}$ | -0.814084182 | $c_0$             | 0.710701177  |
| $a_{020}$          | -1.059864769 | $a_{201}$ | -0.055000108 | $c_1$             | -1.941499329 |
| $a_{021}$          | -3.279728742 | $a_{202}$ | 0.837087648  | $c_2$             | -0.820386618 |
| $a_{022}$          | -4.357572238 | $a_{203}$ | -1.165170805 | $c_3$             | -2.160021538 |
| $a_{023}$          | -0.400672749 | $a_{210}$ | 1.169855634  | $c_4$             | 1.184473418  |
| $a_{030}$          | -0.284525701 | $a_{211}$ | -3.048643977 | $c_5$             | 0.561395141  |
| $a_{031}$          | -2.539921881 | $a_{212}$ | 6.018704766  | $c_6$             | -1.200071513 |
| $a_{032}$          | -1.81154969  | $a_{300}$ | 0.08433292   | $c_7$             | 2.41042793   |
| $a_{100}$          | 0.920088229  | $a_{301}$ | -1.155597218 | $c_8$             | -3.397253208 |
| $a_{101}$          | 0.72264503   | $a_{302}$ | 0.341332712  |                   |              |
| HF exchange        |              |           |              | Damped dispersion |              |
| $X$                | 41.7050      |           |              | $S_{r,6}$         | 1.53         |



**Supplementary Table S2. Training sets and the final inverse weights.**

| Index | Database                   | Description                                                                                   | Source  | Number of data | Inverse weight |
|-------|----------------------------|-----------------------------------------------------------------------------------------------|---------|----------------|----------------|
| 1     | BHPERI26 <sup>1,2</sup>    | Barrier heights of pericyclic reactions                                                       | MGCDB84 | 26             | 0.1343         |
| 2     | CR20 <sup>3</sup>          | Cycloreversion reaction energies                                                              | MGCDB84 | 20             | 0.3165         |
| 3     | CRBH20 <sup>4</sup>        | Barrier heights for cycloreversion of heterocyclic rings                                      | MGCDB84 | 20             | 0.5913         |
| 4     | PX13 <sup>5,6</sup>        | Barrier heights for proton exchange in water, ammonia, and hydrogen fluoride clusters         | MGCDB84 | 13             | 1.7577         |
| 5     | WCPT27 <sup>7</sup>        | Barrier heights of water-catalyzed proton-transfer reactions                                  | MGCDB84 | 27             | 0.2839         |
| 6     | HTBH38/18 <sup>8</sup>     | Hydrogen transfer barrier heights                                                             | MDB2019 | 38             | 0.2085         |
| 7     | NHTBH38/18 <sup>9</sup>    | Non-hydrogen transfer barrier heights                                                         | MDB2019 | 38             | 0.1557         |
| 8     | NCCE30/18 <sup>10-14</sup> | Noncovalent complexation energies                                                             | MDB2019 | 30             | 0.0694         |
| 9     | NGD21/18 <sup>10,15</sup>  | Noble gas dimer weak interactions                                                             | MDB2019 | 21             | 0.2699         |
| 10    | A21x12 <sup>16</sup>       | PECs for the 21 equilibrium complexes from A24                                                | MGCDB84 | 252            | 0.0571         |
| 11    | A24 <sup>17</sup>          | Binding energies of small noncovalent complexes                                               | MGCDB84 | 24             | 0.0633         |
| 12    | Bauza30 <sup>18,19</sup>   | Binding energies of halogen-, chalcogen-, and pnictogen-bonded dimers                         | MGCDB84 | 30             | 0.0845         |
| 13    | BzDC215 <sup>20</sup>      | PECs for benzene interacting with two rare-gas atoms and eight first- and second-row hydrides | MGCDB84 | 215            | 0.2209         |
| 14    | CT20 <sup>21</sup>         | Binding energies of charge-transfer complexes                                                 | MGCDB84 | 20             | 0.1062         |
| 15    | DS14 <sup>22</sup>         | Binding energies of complexes containing divalent sulfur                                      | MGCDB84 | 14             | 0.1020         |
| 16    | FmH2O10 <sup>23,24</sup>   | Binding energies of isomers of F <sup>-</sup> (H <sub>2</sub> O) <sub>10</sub>                | MGCDB84 | 10             | 0.5567         |
| 17    | WATER27 <sup>1,25</sup>    | Binding energies of neutral and charged water clusters                                        | MGCDB84 | 23             | 0.6808         |
| 18    | H2O6Bind8 <sup>23,24</sup> | Binding energies of isomers of (H <sub>2</sub> O) <sub>6</sub>                                | MGCDB84 | 8              | 0.1140         |
| 19    | HB15 <sup>26</sup>         | Binding energies of hydrogen-bonded dimers featuring ionic groups common in biomolecules      | MGCDB84 | 15             | 0.1698         |
| 20    | HW30 <sup>27</sup>         | Binding energies of hydrocarbon-water dimers                                                  | MGCDB84 | 30             | 0.2215         |
| 21    | HW6Cl <sup>23,24</sup>     | Binding energies of Cl <sup>-</sup> (H <sub>2</sub> O) <sub>n</sub> (n=1-6)                   | MGCDB84 | 6              | 1.1148         |
| 22    | HW6F <sup>23,24</sup>      | Binding energies of F <sup>-</sup> (H <sub>2</sub> O) <sub>n</sub> (n=1-6)                    | MGCDB84 | 6              | 0.0989         |
| 23    | Shields38 <sup>28</sup>    | Binding energies of (H <sub>2</sub> O) <sub>n</sub> (n=2-10)                                  | MGCDB84 | 38             | 0.3371         |
| 24    | SW49Bind345 <sup>29</sup>  | Binding energies of SO <sub>4</sub> <sup>2-</sup> (H <sub>2</sub> O) <sub>n</sub> (n=3-5)     | MGCDB84 | 31             | 0.1327         |
| 25    | SW49Bind6 <sup>29</sup>    | Binding energies of SO <sub>4</sub> <sup>2-</sup> (H <sub>2</sub> O) <sub>6</sub>             | MGCDB84 | 18             | 0.1513         |
| 26    | TA13 <sup>30</sup>         | Binding energies of dimers involving radicals                                                 | MGCDB84 | 13             | 0.2056         |
| 27    | AlkBind12 <sup>31</sup>    | Binding energies of saturated and                                                             | MGCDB84 | 12             | 0.1888         |

| Index | Database                            | Description                                                                                         | Source  | Number of data | Inverse weight |
|-------|-------------------------------------|-----------------------------------------------------------------------------------------------------|---------|----------------|----------------|
|       |                                     | unsaturated hydrocarbon dimers                                                                      |         |                |                |
| 28    | HB49 <sup>32-34</sup>               | Binding energies of small- and medium-sized hydrogen-bonded systems                                 | MGCDB84 | 49             | 0.1607         |
| 29    | Ionic43 <sup>35</sup>               | Binding energies of anion-neutral, cation-neutral, and anion-cation dimers                          | MGCDB84 | 43             | 0.4545         |
| 30    | H2O20Bind4 <sup>1, 25, 36, 37</sup> | Binding energies of isomers of (H <sub>2</sub> O) <sub>20</sub> (dod, fc, fs, and es)               | MGCDB84 | 4              | 0.4451         |
| 31    | H2O20Bind10 <sup>23</sup>           | Binding energies of isomers of (H <sub>2</sub> O) <sub>20</sub> (low-energy structures)             | MGCDB84 | 10             | 0.3135         |
| 32    | CE20 <sup>5, 6</sup>                | Binding energies of water, ammonia, and hydrogen fluoride clusters                                  | MGCDB84 | 20             | 0.1550         |
| 33    | NC15 <sup>38</sup>                  | Binding energies of very small noncovalent complexes                                                | MGCDB84 | 15             | 0.0674         |
| 34    | IsoL6/11 <sup>10</sup>              | Isomerization energies of large molecules                                                           | MDB2019 | 6              | 1.1202         |
| 35    | 2pIsoE4 <sup>39</sup>               | 2p isomerization energies                                                                           | MDB2019 | 4              | 1.3452         |
| 36    | 4pIsoE4 <sup>39</sup>               | 4p isomerization energies                                                                           | MDB2019 | 4              | 1.2523         |
| 37    | AlkIsomer11 <sup>40</sup>           | Isomerization energies of $n = 4 - 8$ alkanes                                                       | MGCDB84 | 11             | 0.0622         |
| 38    | Butanediol65 <sup>41</sup>          | Isomerization energies of butane-1,4-diol                                                           | MGCDB84 | 65             | 0.0073         |
| 39    | DIE60 <sup>42</sup>                 | Isomerization energies of reactions involving double-bond migration in conjugated dienes            | MGCDB84 | 60             | 0.3867         |
| 40    | EIE22 <sup>43</sup>                 | Isomerization energies of enecarbonyls                                                              | MGCDB84 | 22             | 0.4046         |
| 41    | ACONF <sup>1, 44</sup>              | Isomerization energies of alkane conformers                                                         | MGCDB84 | 15             | 0.0471         |
| 42    | CYCONF <sup>1, 45</sup>             | Isomerization energies of cysteine conformers                                                       | MGCDB84 | 11             | 0.1077         |
| 43    | Pentane14 <sup>46</sup>             | Isomerization energies of stationary points on the n-pentane torsional surface                      | MGCDB84 | 14             | 0.0252         |
| 44    | SW49Rel345 <sup>29</sup>            | Isomerization energies of SO <sub>4</sub> <sup>2-</sup> (H <sub>2</sub> O) <sub>n</sub> ( $n=3-5$ ) | MGCDB84 | 31             | 0.0867         |
| 45    | SW49Rel6 <sup>29</sup>              | Isomerization energies of SO <sub>4</sub> <sup>2-</sup> (H <sub>2</sub> O) <sub>6</sub>             | MGCDB84 | 18             | 0.0615         |
| 46    | H2O20Rel4 <sup>1, 25, 36, 37</sup>  | Isomerization energies of isomers of (H <sub>2</sub> O) <sub>20</sub> (dod, fc, fs, and es)         | MGCDB84 | 4              | 0.1484         |
| 47    | H2O20Rel10 <sup>23</sup>            | Isomerization energies of isomers of (H <sub>2</sub> O) <sub>20</sub> (low-energy structures)       | MGCDB84 | 10             | 0.1456         |
| 48    | H2O16Rel5 <sup>47</sup>             | Isomerization energies of (H <sub>2</sub> O) <sub>16</sub> (boat and fused cube structures)         | MGCDB84 | 5              | 0.0362         |
| 49    | AlkAtom19 <sup>40</sup>             | $n = 1-8$ alkane atomization energies                                                               | MGCDB84 | 19             | 0.1080         |
| 50    | AlkIsod14 <sup>40</sup>             | $n = 3-8$ alkane isodesmic reaction energies                                                        | MGCDB84 | 14             | 0.0994         |
| 51    | G21EA <sup>1, 48</sup>              | Adiabatic electron affinities of atoms and small molecules                                          | MGCDB84 | 25             | 1.9061         |
| 52    | G21IP <sup>1, 48</sup>              | Adiabatic ionization potentials of atoms and small molecules                                        | MGCDB84 | 36             | 2.8200         |
| 53    | NBPRC <sup>1, 49, 50</sup>          | Reactions involving NH <sub>3</sub> /BH <sub>3</sub> and                                            | MGCDB84 | 12             | 1.2623         |

| Index | Database                          | Description                                                                                                         | Source  | Number of data | Inverse weight |
|-------|-----------------------------------|---------------------------------------------------------------------------------------------------------------------|---------|----------------|----------------|
| 54    | BSR36 <sup>50, 51</sup>           | PH <sub>3</sub> /BH <sub>3</sub><br>Hydrocarbon bond separation reaction energies                                   | MGCDB84 | 36             | 0.3311         |
| 55    | HNBrBDE18 <sup>52</sup>           | Homolytic N–Br bond dissociation energies                                                                           | MGCDB84 | 18             | 1.1192         |
| 56    | PlatonicTAE6 <sup>53</sup>        | Total atomization energies of platonic hydrocarbon cages, C <sub>n</sub> H <sub>n</sub> ( <i>n</i> =4,6,8,10,12,20) | MGCDB84 | 6              | 0.5139         |
| 57    | PlatonicIG6 <sup>53</sup>         | Isogyric reactions of platonic hydrocarbon cages, C <sub>n</sub> H <sub>n</sub> ( <i>n</i> =4,6,8,10,12,20)         | MGCDB84 | 6              | 4.0677         |
| 58    | PlatonicID6 <sup>53</sup>         | Isodesmic reactions of platonic hydrocarbon cages, C <sub>n</sub> H <sub>n</sub> ( <i>n</i> =4,6,8,10,12,20)        | MGCDB84 | 6              | 0.3028         |
| 59    | PlatonicHD6 <sup>53</sup>         | Homodesmotic reactions of platonic hydrocarbon cages, C <sub>n</sub> H <sub>n</sub> ( <i>n</i> =4,6,8,10,12,20)     | MGCDB84 | 6              | 4.6747         |
| 60    | WCPT6 <sup>7</sup>                | Tautomerization energies for water-catalyzed proton-transfer reactions                                              | MGCDB84 | 6              | 0.1488         |
| 61    | SR-MGM-BE8 <sup>10, 54, 55</sup>  | Single-reference main-group metal bond energies                                                                     | MDB2019 | 8              | 0.8401         |
| 62    | SR-MGN-BE10 <sup>710</sup>        | Single-reference main-group non-metal bond energies                                                                 | MDB2019 | 107            | 0.9376         |
| 63    | MR-MGM-BE4 <sup>10</sup>          | Multi-reference main-group metal bond energies                                                                      | MDB2019 | 4              | 0.7942         |
| 64    | MR-MGN-BE17 <sup>10</sup>         | Multi-reference main-group non-metal bond energies                                                                  | MDB2019 | 17             | 3.3421         |
| 65    | SR-TML-BE11 <sup>10, 55-57</sup>  | Single-reference TM <sup>g</sup> bond energies                                                                      | MDB2019 | 11             | 3.2198         |
| 66    | SR-TMD-BE4 <sup>10</sup>          | multi-reference TM bond energies                                                                                    | MDB2019 | 4              | 3.2198         |
| 67    | MR-TML-BE12 <sup>10, 55, 57</sup> | single-reference TM dimer bond energies (Cu <sub>2</sub> , CuAg, Zr <sub>2</sub> , Ag <sub>2</sub> )                | MDB2019 | 12             | 3.4096         |
| 68    | MR-TMD-BE3 <sup>10, 58</sup>      | multi-reference TM dimer bond energies (V <sub>2</sub> , Cr <sub>2</sub> , Fe <sub>2</sub> )                        | MDB2019 | 3              | 1.0968         |
| 69    | πTC13 <sup>10</sup>               | Thermochemistry of π systems                                                                                        | MDB2019 | 13             | 4.0142         |
| 70    | HC7/11 <sup>10</sup>              | Hydrocarbon chemistry                                                                                               | MDB2019 | 7              | 1.9148         |
| 71    | IP23 <sup>10, 59</sup>            | Ionization potentials                                                                                               | MDB2019 | 23             | 1.7727         |
| 72    | EA13/03 <sup>10</sup>             | Electron affinities                                                                                                 | MDB2019 | 13             | 1.1354         |
| 73    | PA8 <sup>10</sup>                 | Proton affinities                                                                                                   | MDB2019 | 8              | 0.9259         |
| 74    | AE17 <sup>10</sup>                | Atomic energies                                                                                                     | MDB2019 | 17             | 4.6426         |
| 75    | DC9/19 <sup>10</sup>              | Difficult cases                                                                                                     | MDB2019 | 9              | 4.8733         |
| 76    | SMAE3/19 <sup>60-62</sup>         | Sulfur molecules atomization energies                                                                               | MDB2019 | 3              | 0.9361         |
| 77    | 3dEE8 <sup>10, 58, 59</sup>       | 3d TM atomic excitation energies and first excitation energy of Fe <sub>2</sub>                                     | MDB2019 | 8              | 1.7215         |
| 78    | 4dAEE5 <sup>63</sup>              | 4d TM atomic excitation energies                                                                                    | MDB2019 | 5              | 0.8205         |
| 79    | pAEE5 <sup>64</sup>               | p-block atomic excitation energies                                                                                  | MDB2019 | 5              | 3.1988         |
| 80    | DBH24 <sup>65, 66</sup>           | Diverse barrier heights                                                                                             | MGCDB84 | 24             | 0.0550         |

---

| <b>Index</b> | <b>Database</b>               | <b>Description</b>                        | <b>Source</b> | <b>Number of data</b> | <b>Inverse weight</b> |
|--------------|-------------------------------|-------------------------------------------|---------------|-----------------------|-----------------------|
| 81           | BH76RC <sup>1, 8, 9</sup>     | Reaction energies from HTBH38 and NHTBH38 | MGCDB84       | 30                    | 0.0813                |
| 82           | ISOMERIZATION20 <sup>60</sup> | Isomerization energies                    | MGCDB84       | 20                    | 0.2786                |
| 83           | BDE99MR <sup>60</sup>         | Bond dissociation energies (MR)           | MGCDB84       | 16                    | 0.2346                |
| 84           | BDE99nonMR <sup>60</sup>      | Bond dissociation energies (SR)           | MGCDB84       | 83                    | 0.2933                |
| 85           | HAT707MR <sup>60</sup>        | Heavy-atom transfer energies (MR)         | MGCDB84       | 202                   | 0.1092                |
| 86           | HAT707nonMR <sup>60</sup>     | Heavy-atom transfer energies (SR)         | MGCDB84       | 505                   | 0.1366                |
| 87           | SN13 <sup>60</sup>            | Nucleophilic substitution energies        | MGCDB84       | 13                    | 0.1067                |
| 88           | TAE140MR <sup>60</sup>        | Total atomization energies (MR)           | MGCDB84       | 16                    | 0.4876                |
| 89           | TAE140nonMR <sup>60</sup>     | Total atomization energies (SR)           | MGCDB84       | 124                   | 0.1625                |
| 90           | AAIE12                        | Amino-acid interaction energies           | Present       | 12                    | 0.0006                |

---

**Supplementary Table S3. Functionals compared in this work.**

| <b>Functionals</b>                        | <b>Ref(s)</b> | <b>Type</b>            | <b>Damped dispersion</b> |
|-------------------------------------------|---------------|------------------------|--------------------------|
| <b>Local functionals</b>                  |               |                        |                          |
| PBE                                       | 67            | GGA <sup>a</sup>       | none                     |
| PBE-D3(BJ)                                | 67            | GGA                    | D3(BJ) <sup>b,68</sup>   |
| TPSS                                      | 69            | meta-GGA               | none                     |
| TPSS-D3(BJ)                               | 69            | meta-GGA               | D3(BJ) <sup>68</sup>     |
| M06-L                                     | 70            | meta-GGA               | none                     |
| M06-L-D3(0)                               | 70            | meta-GGA               | D3(0) <sup>c,71</sup>    |
| MN15-L                                    | 72            | meta-NGA               | none                     |
| revM06-L                                  | 73            | meta-GGA               | none                     |
| SCAN-D3(0)                                | 74            | meta-GGA               | D3(0) <sup>75</sup>      |
| r2SCAN                                    | 76            | meta-GGA               | none                     |
| r2SCAN-3c                                 | 77            | meta-GGA               | D4 <sup>d,78</sup>       |
| <b>Range-separated hybrid functionals</b> |               |                        |                          |
| $\omega$ B97X-D                           | 79            | range-separated hybrid | D2 <sup>e,80</sup>       |
| M11                                       | 81            | range-separated hybrid | none                     |
| M11-D3(BJ)                                | 81            | range-separated hybrid | D3(BJ) <sup>82</sup>     |
| revM11                                    | 83            | range-separated hybrid | none                     |
| M11plus                                   | 84            | range-separated hybrid | none                     |
| $\omega$ B97X-V                           | 85            | range-separated hybrid | VV10 <sup>f,85</sup>     |
| $\omega$ B97M-V                           | 86            | range-separated hybrid | VV10 <sup>86</sup>       |
| M06-SX                                    | 87            | range-separated hybrid | none                     |
| DM21                                      | 88            | range-separated hybrid | D3(BJ) <sup>68</sup>     |
| <b>Global hybrid functionals</b>          |               |                        |                          |
| B3LYP                                     | 89, 90        | global hybrid GGA      | none                     |
| B3LYP-D3(BJ)                              | 89, 90        | global hybrid GGA      | D3(BJ) <sup>68</sup>     |
| PBE0                                      | 91, 92        | global hybrid GGA      | none                     |
| PBE0-D3(BJ)                               | 91, 92        | global hybrid GGA      | D3(BJ) <sup>68</sup>     |
| M05-2X                                    | 93            | global hybrid meta-GGA | none                     |

|                                  |          |                          |                       |
|----------------------------------|----------|--------------------------|-----------------------|
| M05-2X-D3(0)                     | 93       | global hybrid meta-GGA   | D3(0) <sup>71</sup>   |
| PW6B95-D3(BJ)                    | 94       | global hybrid meta-GGA   | D3(BJ) <sup>68</sup>  |
| M06-2X                           | 95       | global hybrid meta-GGA   | none                  |
| M06-2X-D3(0)                     | 95       | global hybrid meta-GGA   | D3(0) <sup>71</sup>   |
| M06                              | 95       | global hybrid meta-GGA   | none                  |
| M06-D3(0)                        | 95       | global hybrid meta-GGA   | D3(0) <sup>71</sup>   |
| M08-HX                           | 96       | global hybrid meta-GGA   | none                  |
| MN15                             | 97       | global hybrid meta-NGA   | none                  |
| MN15-D3(BJ)                      | 97       | global hybrid meta-NGA   | D3(BJ) <sup>68</sup>  |
| revM06                           | 98       | global hybrid meta-GGA   | none                  |
| CF22D                            | 99       | global hybrid meta-NGA   | D3(0) <sup>100</sup>  |
| PpF                              | present  | global hybrid meta-NGA   | D3(0) <sup>100</sup>  |
| <b>Doubly hybrid functionals</b> |          |                          |                       |
| DSD-BLYP-D3(BJ)                  | 71, 101  | doubly hybrid functional | D3(BJ) <sup>71</sup>  |
| B2GPPLYP-D3(BJ)                  | 66, 71   | doubly hybrid functional | D3(BJ) <sup>71</sup>  |
| B2PLYP-D3(BJ)                    | 71, 102  | doubly hybrid functional | D3(BJ) <sup>71</sup>  |
| MPW2PLYP-D3(BJ)                  | 103, 104 | doubly hybrid functional | D3(BJ) <sup>103</sup> |
| PWPB95-D3(BJ)                    | 50, 71   | doubly hybrid functional | D3(BJ) <sup>71</sup>  |

<sup>a</sup>GGA denotes generalized gradient approximations; NGA denotes nonseparable gradient approximation.

<sup>b</sup>D3(BJ) refers to D3 molecular mechanics dispersion term with empirical Becke-Johnson damping.

<sup>c</sup>D3(0) refers to the original D3 molecular mechanics dispersion term that is empirically damped to zero.

<sup>d</sup>D4 refers to an atomic-charge-dependent London dispersion correction with empirical damping.

<sup>e</sup>D2 refers to a pairwise-additive molecular mechanics dispersion correction with empirical damping.

<sup>f</sup>VV10 is a density-based nonlocal correlation term.

**Supplementary Table S4. Interaction energies (kcal/mol) of the amino-acid pair training and test sets for 28 functionals and the reference method.**

| <b>Dataset</b>      | <b>System</b> | <b>DLPNO-CCSD(T)</b> | <b>PpF</b> | $\omega$ <b>B97X-V</b> | <b>PBE0-D3(BJ)</b> | $\omega$ <b>B97X-D</b> | $\omega$ <b>B97M-V</b> | <b>B3LYP-D3(BJ)</b> |
|---------------------|---------------|----------------------|------------|------------------------|--------------------|------------------------|------------------------|---------------------|
| <b>Training set</b> | 1             | -21.78               | -21.81     | -22.03                 | -21.88             | -21.91                 | -22.14                 | -22.06              |
|                     | 2             | -9.75                | -9.89      | -9.84                  | -9.84              | -9.83                  | -9.86                  | -9.82               |
|                     | 3             | -9.75                | -9.64      | -9.73                  | -9.69              | -9.64                  | -9.77                  | -9.65               |
|                     | 4             | -11.79               | -11.95     | -11.87                 | -11.77             | -12.27                 | -12.01                 | -11.87              |
|                     | 5             | -15.93               | -15.98     | -16.04                 | -15.93             | -16.01                 | -16.28                 | -16.08              |
|                     | 6             | -71.71               | -71.94     | -71.81                 | -72.43             | -71.89                 | -71.99                 | -72.49              |
|                     | 7             | -105.93              | -105.90    | -105.68                | -105.87            | -105.62                | -105.81                | -105.86             |
|                     | 8             | -9.35                | -9.52      | -9.31                  | -9.25              | -9.32                  | -9.49                  | -9.21               |
|                     | 9             | -14.39               | -14.23     | -14.11                 | -14.29             | -14.28                 | -14.62                 | -14.49              |
|                     | 10            | -0.61                | -0.58      | -0.47                  | -0.86              | -0.77                  | -0.51                  | -0.76               |
|                     | 11            | -26.21               | -26.04     | -26.03                 | -26.42             | -26.40                 | -26.47                 | -26.87              |
|                     | 12            | -14.51               | -14.47     | -14.43                 | -14.55             | -15.04                 | -14.87                 | -14.77              |
| <b>Test set</b>     | 1             | -9.19                | -9.29      | -9.16                  | -9.31              | -9.37                  | -9.28                  | -9.29               |
|                     | 2             | -21.16               | -21.21     | -21.36                 | -21.04             | -21.09                 | -21.59                 | -21.54              |
|                     | 3             | -14.43               | -14.43     | -14.25                 | -14.52             | -14.84                 | -14.63                 | -14.70              |
|                     | 4             | -15.59               | -15.58     | -15.74                 | -15.75             | -15.73                 | -15.83                 | -15.83              |
|                     | 5             | -10.02               | -10.00     | -9.85                  | -10.16             | -10.17                 | -10.10                 | -10.29              |

---

|    |        |        |        |        |        |        |        |
|----|--------|--------|--------|--------|--------|--------|--------|
| 6  | -10.86 | -10.69 | -10.42 | -11.16 | -11.27 | -11.15 | -11.16 |
| 7  | -1.14  | -1.16  | -1.06  | -1.22  | -1.33  | -0.98  | -1.20  |
| 8  | -7.04  | -7.13  | -7.08  | -7.38  | -7.27  | -7.19  | -7.37  |
| 9  | -14.70 | -14.59 | -14.65 | -14.96 | -14.48 | -14.86 | -15.00 |
| 10 | -15.15 | -15.07 | -15.07 | -15.16 | -15.10 | -15.33 | -15.34 |
| 11 | -8.75  | -8.70  | -8.81  | -9.30  | -8.70  | -8.82  | -9.24  |
| 12 | -6.24  | -5.89  | -5.93  | -6.78  | -6.21  | -6.03  | -6.61  |
| 13 | -7.04  | -7.00  | -6.91  | -7.20  | -7.23  | -7.03  | -7.22  |
| 14 | -10.11 | -9.87  | -9.84  | -10.14 | -9.96  | -10.06 | -10.17 |
| 15 | -7.40  | -7.45  | -7.49  | -7.17  | -6.96  | -7.52  | -7.21  |
| 16 | -12.95 | -13.13 | -13.02 | -13.02 | -13.12 | -13.23 | -13.00 |
| 17 | -10.17 | -10.08 | -10.00 | -10.21 | -10.15 | -10.15 | -10.28 |
| 18 | -8.80  | -8.66  | -8.59  | -8.73  | -8.53  | -8.79  | -8.74  |
| 19 | -6.71  | -6.61  | -6.66  | -7.37  | -6.92  | -6.79  | -7.18  |
| 20 | -20.32 | -20.09 | -20.21 | -20.47 | -20.19 | -20.40 | -20.74 |
| 21 | -6.69  | -6.72  | -6.03  | -6.56  | -6.56  | -6.65  | -6.71  |
| 22 | -11.82 | -11.57 | -11.60 | -11.52 | -12.12 | -12.12 | -11.92 |
| 23 | -16.02 | -16.02 | -15.84 | -16.36 | -16.70 | -16.27 | -16.48 |
| 24 | -9.71  | -9.73  | -9.64  | -10.10 | -9.63  | -9.70  | -10.04 |

---

| Dataset             | System | M06-2X-D3(0) | CF22D   | PBE-D3(BJ) | M06-L-D3(0) | revM11  | PW6B95-D3(BJ) | revM06  |
|---------------------|--------|--------------|---------|------------|-------------|---------|---------------|---------|
| <b>Training set</b> | 1      | -21.92       | -21.19  | -21.05     | -21.80      | -21.18  | -20.85        | -20.90  |
|                     | 2      | -9.84        | -9.56   | -9.44      | -10.01      | -9.12   | -9.23         | -9.04   |
|                     | 3      | -9.60        | -9.36   | -9.48      | -10.45      | -8.50   | -9.08         | -8.49   |
|                     | 4      | -11.98       | -11.47  | -11.40     | -12.84      | -11.11  | -11.24        | -10.91  |
|                     | 5      | -16.34       | -15.27  | -15.21     | -16.52      | -15.75  | -14.85        | -15.31  |
|                     | 6      | -72.09       | -71.80  | -73.15     | -72.33      | -71.22  | -71.64        | -71.19  |
|                     | 7      | -106.08      | -105.37 | -105.17    | -106.17     | -104.92 | -105.02       | -105.06 |
|                     | 8      | -9.66        | -9.08   | -9.02      | -10.42      | -8.74   | -8.65         | -8.58   |
|                     | 9      | -14.75       | -13.26  | -13.42     | -14.79      | -13.26  | -12.84        | -12.81  |
|                     | 10     | -0.36        | -0.53   | -1.15      | -0.71       | 0.44    | -0.56         | 0.37    |
|                     | 11     | -26.64       | -24.87  | -26.00     | -27.24      | -25.75  | -24.78        | -25.31  |
|                     | 12     | -15.11       | -13.60  | -13.80     | -15.86      | -14.05  | -13.16        | -13.48  |
| <b>Test set</b>     | 1      | -9.37        | -8.87   | -8.84      | -9.58       | -8.47   | -8.54         | -8.33   |
|                     | 2      | -22.06       | -20.60  | -20.45     | -21.69      | -21.64  | -20.38        | -21.17  |
|                     | 3      | -14.90       | -13.52  | -13.77     | -15.46      | -14.03  | -13.33        | -13.64  |
|                     | 4      | -15.83       | -15.04  | -15.06     | -15.89      | -15.56  | -14.79        | -15.21  |
|                     | 5      | -10.34       | -9.47   | -9.98      | -10.68      | -9.32   | -9.21         | -9.16   |
|                     | 6      | -11.71       | -9.41   | -10.53     | -12.55      | -9.95   | -9.10         | -9.38   |
|                     | 7      | -0.95        | -1.15   | -1.36      | -1.17       | -0.79   | -1.20         | -0.76   |
|                     | 8      | -7.25        | -6.84   | -7.33      | -7.76       | -6.61   | -6.54         | -6.61   |

---

|    |        |        |        |        |        |        |        |
|----|--------|--------|--------|--------|--------|--------|--------|
| 9  | -14.85 | -14.02 | -14.52 | -15.01 | -13.66 | -13.61 | -13.74 |
| 10 | -15.27 | -14.32 | -14.45 | -15.51 | -14.36 | -13.93 | -14.13 |
| 11 | -8.68  | -8.48  | -9.09  | -8.68  | -8.16  | -8.30  | -7.92  |
| 12 | -5.79  | -5.66  | -6.89  | -6.35  | -5.12  | -5.58  | -5.04  |
| 13 | -7.11  | -6.58  | -7.05  | -7.58  | -6.37  | -6.46  | -6.32  |
| 14 | -10.04 | -9.35  | -9.76  | -10.40 | -9.32  | -9.14  | -8.98  |
| 15 | -7.58  | -7.17  | -7.03  | -7.77  | -7.48  | -7.10  | -7.23  |
| 16 | -13.36 | -12.55 | -12.32 | -13.97 | -12.29 | -12.07 | -12.15 |
| 17 | -10.23 | -9.64  | -9.99  | -10.63 | -9.23  | -9.45  | -9.16  |
| 18 | -8.80  | -8.20  | -8.42  | -8.94  | -8.29  | -8.03  | -8.00  |
| 19 | -7.02  | -6.27  | -7.08  | -7.09  | -6.38  | -6.15  | -6.10  |
| 20 | -20.38 | -19.41 | -20.07 | -20.25 | -19.68 | -19.38 | -19.49 |
| 21 | -7.49  | -5.94  | -6.21  | -7.38  | -6.26  | -5.69  | -5.90  |
| 22 | -12.49 | -10.75 | -10.76 | -13.17 | -11.20 | -10.63 | -10.75 |
| 23 | -16.40 | -15.07 | -15.63 | -16.78 | -15.16 | -15.00 | -14.94 |
| 24 | -9.74  | -9.35  | -9.89  | -9.65  | -9.31  | -9.22  | -9.18  |

---

| <b>Dataset</b>      | <b>System</b> | <b>TPSS-D3(BJ)</b> | <b>M11</b> | <b>M06-L</b> | <b>MN15-L</b> | <b>MN15</b> | <b>M06-2X</b> | <b>M06</b> |
|---------------------|---------------|--------------------|------------|--------------|---------------|-------------|---------------|------------|
| <b>Training set</b> | 1             | -20.48             | -20.87     | -19.96       | -20.79        | -20.42      | -20.22        | -20.04     |
|                     | 2             | -9.14              | -8.70      | -8.67        | -9.14         | -8.78       | -8.60         | -8.49      |
|                     | 3             | -9.19              | -7.78      | -8.60        | -9.52         | -8.44       | -7.90         | -8.28      |
|                     | 4             | -11.07             | -9.87      | -10.90       | -12.46        | -11.10      | -10.20        | -10.74     |
|                     | 5             | -14.46             | -15.41     | -14.81       | -15.31        | -14.88      | -14.78        | -14.77     |
|                     | 6             | -72.50             | -71.19     | -70.68       | -69.86        | -70.84      | -71.27        | -70.51     |
|                     | 7             | -104.82            | -104.96    | -104.99      | -104.12       | -104.55     | -104.99       | -104.22    |
|                     | 8             | -8.53              | -8.22      | -8.73        | -9.83         | -8.58       | -8.11         | -8.54      |
|                     | 9             | -12.84             | -13.52     | -12.87       | -11.75        | -12.24      | -13.00        | -12.69     |
|                     | 10            | -1.02              | 0.97       | 0.25         | 0.17          | 0.24        | 0.54          | 0.40       |
|                     | 11            | -25.17             | -26.14     | -25.51       | -24.13        | -24.51      | -25.08        | -24.80     |
|                     | 12            | -13.10             | -13.91     | -13.91       | -13.63        | -13.31      | -13.34        | -13.97     |
| <b>Test set</b>     | 1             | -8.57              | -8.24      | -8.23        | -7.99         | -8.06       | -8.13         | -8.03      |
|                     | 2             | -19.67             | -21.54     | -20.18       | -21.37        | -20.67      | -20.70        | -19.72     |
|                     | 3             | -13.21             | -14.19     | -13.93       | -13.43        | -13.40      | -13.52        | -13.69     |
|                     | 4             | -14.50             | -15.37     | -14.52       | -15.38        | -15.00      | -14.58        | -14.43     |
|                     | 5             | -9.59              | -9.23      | -9.39        | -8.86         | -8.91       | -9.17         | -9.01      |
|                     | 6             | -9.69              | -10.14     | -10.78       | -7.88         | -8.95       | -10.12        | -9.85      |
|                     | 7             | -1.24              | -0.18      | -0.52        | -1.44         | -0.98       | -0.34         | -0.26      |
|                     | 8             | -6.81              | -5.80      | -6.59        | -7.09         | -6.38       | -6.20         | -6.18      |

---

|    |        |        |        |        |        |        |        |
|----|--------|--------|--------|--------|--------|--------|--------|
| 9  | -13.83 | -13.17 | -13.42 | -13.13 | -12.86 | -13.41 | -12.97 |
| 10 | -13.88 | -14.18 | -13.89 | -13.54 | -13.57 | -13.79 | -13.72 |
| 11 | -8.76  | -7.88  | -7.64  | -6.50  | -7.61  | -7.71  | -7.23  |
| 12 | -6.42  | -4.50  | -5.33  | -4.16  | -4.92  | -4.84  | -2.78  |
| 13 | -6.72  | -6.14  | -6.52  | -6.44  | -6.14  | -6.13  | -6.18  |
| 14 | -9.28  | -9.18  | -9.02  | -8.80  | -8.86  | -8.77  | -8.97  |
| 15 | -6.55  | -6.78  | -6.56  | -8.34  | -7.14  | -6.48  | -6.35  |
| 16 | -11.95 | -12.11 | -12.37 | -12.45 | -11.96 | -11.89 | -12.10 |
| 17 | -9.69  | -9.07  | -9.26  | -9.11  | -8.90  | -8.99  | -8.83  |
| 18 | -7.92  | -8.00  | -7.69  | -7.98  | -7.87  | -7.66  | -7.58  |
| 19 | -6.65  | -6.11  | -6.07  | -5.01  | -6.02  | -6.08  | -5.72  |
| 20 | -19.48 | -19.85 | -18.91 | -18.37 | -18.76 | -19.15 | -18.46 |
| 21 | -5.74  | -6.42  | -5.95  | -6.38  | -6.27  | -6.21  | -5.30  |
| 22 | -10.42 | -11.33 | -11.29 | -11.67 | -10.80 | -10.81 | -10.92 |
| 23 | -15.17 | -15.33 | -15.17 | -14.46 | -14.60 | -14.94 | -14.62 |
| 24 | -9.55  | -9.25  | -8.94  | -7.88  | -8.73  | -9.08  | -8.64  |

---

| <b>Dataset</b>      | <b>System</b> | <b>revM06-L</b> | <b>M06-SX</b> | <b>M08-HX</b> | <b>M05-2X</b> | <b>PBE0</b> | <b>PBE</b> | <b>B3LYP</b> | <b>TPSS</b> |
|---------------------|---------------|-----------------|---------------|---------------|---------------|-------------|------------|--------------|-------------|
| <b>Training set</b> | 1             | -20.45          | -20.44        | -20.40        | -20.26        | -17.13      | -16.28     | -15.49       | -14.56      |
|                     | 2             | -8.95           | -8.75         | -8.28         | -8.62         | -6.59       | -6.19      | -5.39        | -5.12       |
|                     | 3             | -8.48           | -8.12         | -6.95         | -7.80         | -5.21       | -5.04      | -3.64        | -3.68       |
|                     | 4             | -10.86          | -10.50        | -9.87         | -9.82         | -6.49       | -6.11      | -4.57        | -4.48       |
|                     | 5             | -14.79          | -14.80        | -14.92        | -14.39        | -10.83      | -10.05     | -8.83        | -8.01       |
|                     | 6             | -70.80          | -70.98        | -71.19        | -71.37        | -70.38      | -71.09     | -69.67       | -69.96      |
|                     | 7             | -104.87         | -104.75       | -104.91       | -104.85       | -102.44     | -101.65    | -100.87      | -100.44     |
|                     | 8             | -8.44           | -8.20         | -7.66         | -7.71         | -4.77       | -4.52      | -3.01        | -2.93       |
|                     | 9             | -11.85          | -12.22        | -12.97        | -12.14        | -8.60       | -7.64      | -6.36        | -5.63       |
|                     | 10            | 0.24            | 0.39          | 0.83          | 0.63          | 1.03        | 0.73       | 1.69         | 1.26        |
|                     | 11            | -24.39          | -24.61        | -25.34        | -24.52        | -20.49      | -19.93     | -18.20       | -17.55      |
|                     | 12            | -12.63          | -12.85        | -13.21        | -12.35        | -8.18       | -7.33      | -5.61        | -4.98       |
| <b>Test set</b>     | 1             | -8.04           | -8.00         | -7.78         | -7.93         | -5.81       | -5.32      | -4.43        | -4.20       |
|                     | 2             | -20.60          | -20.54        | -20.78        | -20.30        | -15.86      | -15.15     | -13.97       | -13.01      |
|                     | 3             | -13.00          | -13.08        | -13.46        | -12.70        | -8.98       | -8.12      | -6.62        | -6.10       |
|                     | 4             | -14.83          | -14.75        | -14.67        | -14.42        | -11.29      | -10.54     | -9.46        | -8.83       |
|                     | 5             | -8.62           | -8.74         | -8.87         | -8.76         | -6.11       | -5.86      | -4.45        | -4.43       |
|                     | 6             | -8.12           | -8.66         | -9.56         | -8.60         | -4.40       | -3.54      | -1.05        | -0.91       |
|                     | 7             | -1.04           | -0.72         | -0.05         | -0.37         | 0.47        | 0.34       | 1.13         | 0.86        |
|                     | 8             | -6.85           | -6.36         | -5.49         | -5.98         | -3.76       | -3.66      | -2.23        | -2.22       |

---

|    |        |        |        |        |        |        |        |        |
|----|--------|--------|--------|--------|--------|--------|--------|--------|
| 9  | -13.53 | -13.31 | -12.70 | -13.28 | -10.46 | -9.99  | -8.68  | -8.17  |
| 10 | -13.71 | -13.68 | -13.72 | -13.44 | -10.40 | -9.63  | -8.58  | -7.86  |
| 11 | -7.64  | -7.69  | -7.27  | -7.91  | -6.80  | -6.58  | -5.79  | -5.66  |
| 12 | -5.11  | -4.91  | -4.41  | -4.80  | -4.07  | -4.13  | -2.78  | -3.00  |
| 13 | -6.35  | -6.07  | -5.84  | -5.84  | -3.88  | -3.68  | -2.47  | -2.50  |
| 14 | -8.58  | -8.61  | -8.79  | -8.42  | -6.09  | -5.67  | -4.42  | -4.17  |
| 15 | -7.42  | -6.97  | -6.47  | -6.32  | -3.95  | -3.80  | -2.73  | -2.53  |
| 16 | -11.86 | -11.67 | -11.33 | -11.49 | -8.26  | -7.50  | -6.23  | -5.92  |
| 17 | -8.84  | -8.78  | -8.50  | -8.75  | -6.44  | -6.19  | -5.00  | -4.96  |
| 18 | -7.62  | -7.66  | -7.82  | -7.40  | -5.11  | -4.76  | -3.61  | -3.35  |
| 19 | -5.64  | -5.77  | -5.57  | -5.91  | -4.08  | -3.71  | -2.32  | -2.43  |
| 20 | -18.91 | -18.99 | -19.42 | -19.16 | -16.44 | -15.99 | -14.99 | -14.37 |
| 21 | -4.81  | -5.34  | -6.14  | -5.19  | -0.37  | 0.26   | 2.77   | 2.39   |
| 22 | -10.16 | -10.04 | -10.16 | -9.44  | -4.42  | -3.55  | -1.58  | -1.29  |
| 23 | -14.28 | -14.41 | -14.98 | -14.21 | -10.69 | -9.84  | -8.18  | -7.88  |
| 24 | -8.88  | -8.99  | -8.97  | -9.16  | -8.08  | -7.83  | -7.14  | -6.99  |

---

Supplementary Table S5. MUEs (kcal/mol) of 28 functionals for the amino-acid pair training and test sets.

| Dataset             | System      | PpF  | $\omega$ B97X-V | PBE0-D3(BJ) | $\omega$ B97X-D | $\omega$ B97M-V | B3LYP-D3(BJ) | M06-2X-D3(0) |
|---------------------|-------------|------|-----------------|-------------|-----------------|-----------------|--------------|--------------|
| <b>Training set</b> | 1           | 0.03 | 0.25            | 0.10        | 0.13            | 0.36            | 0.28         | 0.14         |
|                     | 2           | 0.14 | 0.09            | 0.09        | 0.08            | 0.11            | 0.07         | 0.09         |
|                     | 3           | 0.11 | 0.02            | 0.06        | 0.11            | 0.02            | 0.10         | 0.15         |
|                     | 4           | 0.16 | 0.08            | 0.02        | 0.48            | 0.22            | 0.08         | 0.19         |
|                     | 5           | 0.05 | 0.11            | 0.00        | 0.08            | 0.35            | 0.15         | 0.41         |
|                     | 6           | 0.23 | 0.10            | 0.72        | 0.18            | 0.28            | 0.78         | 0.38         |
|                     | 7           | 0.03 | 0.25            | 0.06        | 0.31            | 0.12            | 0.07         | 0.15         |
|                     | 8           | 0.17 | 0.04            | 0.10        | 0.03            | 0.14            | 0.14         | 0.31         |
|                     | 9           | 0.16 | 0.27            | 0.10        | 0.11            | 0.23            | 0.10         | 0.36         |
|                     | 10          | 0.03 | 0.14            | 0.25        | 0.16            | 0.10            | 0.15         | 0.25         |
|                     | 11          | 0.17 | 0.18            | 0.21        | 0.19            | 0.26            | 0.66         | 0.43         |
|                     | 12          | 0.04 | 0.08            | 0.04        | 0.53            | 0.35            | 0.26         | 0.60         |
|                     | <b>Mean</b> | 0.11 | 0.14            | 0.15        | 0.20            | 0.21            | 0.24         | 0.29         |
| <b>Test set</b>     | 1           | 0.10 | 0.03            | 0.12        | 0.18            | 0.09            | 0.10         | 0.18         |
|                     | 2           | 0.05 | 0.20            | 0.12        | 0.07            | 0.43            | 0.38         | 0.90         |
|                     | 3           | 0.00 | 0.17            | 0.09        | 0.41            | 0.20            | 0.27         | 0.47         |
|                     | 4           | 0.01 | 0.15            | 0.16        | 0.14            | 0.25            | 0.24         | 0.24         |
|                     | 5           | 0.02 | 0.17            | 0.14        | 0.15            | 0.08            | 0.27         | 0.32         |

---

|             |      |      |      |      |      |      |      |
|-------------|------|------|------|------|------|------|------|
| 6           | 0.17 | 0.44 | 0.30 | 0.41 | 0.29 | 0.30 | 0.85 |
| 7           | 0.02 | 0.08 | 0.08 | 0.19 | 0.16 | 0.06 | 0.19 |
| 8           | 0.09 | 0.05 | 0.34 | 0.23 | 0.16 | 0.33 | 0.21 |
| 9           | 0.11 | 0.04 | 0.26 | 0.22 | 0.17 | 0.30 | 0.15 |
| 10          | 0.08 | 0.08 | 0.01 | 0.05 | 0.19 | 0.19 | 0.12 |
| 11          | 0.05 | 0.06 | 0.55 | 0.05 | 0.07 | 0.49 | 0.07 |
| 12          | 0.35 | 0.31 | 0.54 | 0.03 | 0.21 | 0.37 | 0.45 |
| 13          | 0.04 | 0.14 | 0.16 | 0.19 | 0.02 | 0.18 | 0.07 |
| 14          | 0.24 | 0.27 | 0.03 | 0.15 | 0.05 | 0.06 | 0.07 |
| 15          | 0.05 | 0.09 | 0.23 | 0.44 | 0.13 | 0.19 | 0.18 |
| 16          | 0.18 | 0.07 | 0.07 | 0.17 | 0.28 | 0.05 | 0.41 |
| 17          | 0.09 | 0.17 | 0.04 | 0.02 | 0.02 | 0.11 | 0.06 |
| 18          | 0.14 | 0.21 | 0.07 | 0.27 | 0.00 | 0.06 | 0.00 |
| 19          | 0.10 | 0.05 | 0.66 | 0.21 | 0.09 | 0.47 | 0.31 |
| 20          | 0.23 | 0.10 | 0.15 | 0.13 | 0.09 | 0.42 | 0.06 |
| 21          | 0.03 | 0.65 | 0.13 | 0.13 | 0.03 | 0.02 | 0.80 |
| 22          | 0.25 | 0.22 | 0.30 | 0.30 | 0.30 | 0.10 | 0.67 |
| 23          | 0.00 | 0.19 | 0.34 | 0.68 | 0.25 | 0.46 | 0.38 |
| 24          | 0.02 | 0.07 | 0.39 | 0.08 | 0.01 | 0.33 | 0.03 |
| <b>Mean</b> | 0.10 | 0.17 | 0.22 | 0.20 | 0.15 | 0.24 | 0.30 |

---

| Dataset             | System      | CF22D | PBE-D3(BJ) | M06-L-D3(0) | revM11 | PW6B95-D3(BJ) | revM06 | TPSS-D3(BJ) |
|---------------------|-------------|-------|------------|-------------|--------|---------------|--------|-------------|
| <b>Training set</b> | 1           | 0.59  | 0.73       | 0.02        | 0.61   | 0.93          | 0.89   | 1.30        |
|                     | 2           | 0.19  | 0.31       | 0.26        | 0.63   | 0.52          | 0.72   | 0.61        |
|                     | 3           | 0.39  | 0.27       | 0.70        | 1.25   | 0.67          | 1.26   | 0.56        |
|                     | 4           | 0.32  | 0.39       | 1.05        | 0.68   | 0.55          | 0.88   | 0.72        |
|                     | 5           | 0.66  | 0.72       | 0.59        | 0.18   | 1.08          | 0.62   | 1.47        |
|                     | 6           | 0.09  | 1.44       | 0.62        | 0.49   | 0.07          | 0.52   | 0.79        |
|                     | 7           | 0.56  | 0.76       | 0.24        | 1.01   | 0.91          | 0.87   | 1.11        |
|                     | 8           | 0.27  | 0.33       | 1.07        | 0.61   | 0.70          | 0.78   | 0.82        |
|                     | 9           | 1.13  | 0.97       | 0.40        | 1.12   | 1.55          | 1.58   | 1.55        |
|                     | 10          | 0.08  | 0.54       | 0.10        | 1.05   | 0.05          | 0.98   | 0.41        |
|                     | 11          | 1.34  | 0.21       | 1.03        | 0.46   | 1.43          | 0.90   | 1.04        |
|                     | 12          | 0.91  | 0.71       | 1.35        | 0.46   | 1.35          | 1.03   | 1.41        |
|                     | <b>Mean</b> | 0.55  | 0.62       | 0.62        | 0.71   | 0.82          | 0.92   | 0.98        |
| <b>Test set</b>     | 1           | 0.32  | 0.35       | 0.39        | 0.73   | 0.65          | 0.86   | 0.62        |
|                     | 2           | 0.56  | 0.71       | 0.53        | 0.48   | 0.78          | 0.01   | 1.49        |
|                     | 3           | 0.91  | 0.66       | 1.03        | 0.40   | 1.10          | 0.78   | 1.22        |
|                     | 4           | 0.55  | 0.53       | 0.30        | 0.03   | 0.80          | 0.38   | 1.09        |
|                     | 5           | 0.55  | 0.04       | 0.66        | 0.70   | 0.81          | 0.86   | 0.43        |
|                     | 6           | 1.45  | 0.33       | 1.69        | 0.92   | 1.76          | 1.48   | 1.17        |
|                     | 7           | 0.01  | 0.22       | 0.03        | 0.35   | 0.06          | 0.37   | 0.10        |

---

|             |      |      |      |      |      |      |      |
|-------------|------|------|------|------|------|------|------|
| 8           | 0.20 | 0.29 | 0.72 | 0.43 | 0.50 | 0.42 | 0.23 |
| 9           | 0.68 | 0.18 | 0.31 | 1.04 | 1.09 | 0.96 | 0.87 |
| 10          | 0.83 | 0.70 | 0.36 | 0.78 | 1.22 | 1.02 | 1.27 |
| 11          | 0.27 | 0.34 | 0.07 | 0.59 | 0.45 | 0.83 | 0.01 |
| 12          | 0.58 | 0.65 | 0.11 | 1.13 | 0.66 | 1.20 | 0.18 |
| 13          | 0.46 | 0.01 | 0.54 | 0.67 | 0.58 | 0.72 | 0.32 |
| 14          | 0.76 | 0.35 | 0.29 | 0.79 | 0.97 | 1.13 | 0.83 |
| 15          | 0.23 | 0.37 | 0.37 | 0.08 | 0.30 | 0.17 | 0.85 |
| 16          | 0.40 | 0.63 | 1.02 | 0.66 | 0.88 | 0.81 | 1.00 |
| 17          | 0.53 | 0.18 | 0.46 | 0.94 | 0.72 | 1.02 | 0.48 |
| 18          | 0.60 | 0.38 | 0.14 | 0.50 | 0.77 | 0.79 | 0.88 |
| 19          | 0.44 | 0.37 | 0.38 | 0.33 | 0.56 | 0.61 | 0.06 |
| 20          | 0.91 | 0.25 | 0.07 | 0.64 | 0.94 | 0.83 | 0.84 |
| 21          | 0.75 | 0.48 | 0.69 | 0.43 | 1.00 | 0.78 | 0.95 |
| 22          | 1.07 | 1.06 | 1.35 | 0.62 | 1.19 | 1.07 | 1.40 |
| 23          | 0.95 | 0.39 | 0.76 | 0.86 | 1.02 | 1.09 | 0.85 |
| 24          | 0.36 | 0.18 | 0.06 | 0.41 | 0.49 | 0.53 | 0.16 |
| <b>Mean</b> | 0.60 | 0.40 | 0.51 | 0.60 | 0.80 | 0.78 | 0.72 |

---

| <b>Dataset</b>  | <b>System</b> | <b>M11</b> | <b>M06-L</b> | <b>MN15-L</b> | <b>MN15</b> | <b>M06-2X</b> | <b>M06</b> | <b>revM06-L</b> |
|-----------------|---------------|------------|--------------|---------------|-------------|---------------|------------|-----------------|
| <b>Training</b> | 1             | 0.91       | 1.82         | 0.99          | 1.36        | 1.56          | 1.74       | 1.34            |
|                 | 2             | 1.05       | 1.08         | 0.61          | 0.97        | 1.15          | 1.26       | 0.81            |
|                 | 3             | 1.97       | 1.15         | 0.23          | 1.31        | 1.85          | 1.47       | 1.27            |
|                 | 4             | 1.92       | 0.89         | 0.67          | 0.69        | 1.59          | 1.05       | 0.93            |
|                 | 5             | 0.52       | 1.12         | 0.62          | 1.05        | 1.15          | 1.16       | 1.14            |
|                 | 6             | 0.52       | 1.03         | 1.85          | 0.87        | 0.44          | 1.20       | 0.91            |
|                 | 7             | 0.97       | 0.94         | 1.81          | 1.38        | 0.94          | 1.71       | 1.07            |
|                 | 8             | 1.13       | 0.62         | 0.48          | 0.77        | 1.24          | 0.81       | 0.91            |
|                 | 9             | 0.87       | 1.52         | 2.64          | 2.15        | 1.39          | 1.70       | 2.54            |
|                 | 10            | 1.58       | 0.86         | 0.78          | 0.85        | 1.15          | 1.01       | 0.85            |
|                 | 11            | 0.07       | 0.70         | 2.08          | 1.70        | 1.13          | 1.41       | 1.82            |
|                 | 12            | 0.60       | 0.60         | 0.88          | 1.20        | 1.17          | 0.54       | 1.89            |
|                 | <b>Mean</b>   | 1.01       | 1.03         | 1.14          | 1.19        | 1.23          | 1.26       | 1.29            |
| <b>Test set</b> | 1             | 0.95       | 0.96         | 1.20          | 1.13        | 1.06          | 1.16       | 1.15            |
|                 | 2             | 0.38       | 0.98         | 0.21          | 0.49        | 0.46          | 1.44       | 0.56            |
|                 | 3             | 0.24       | 0.50         | 1.00          | 1.03        | 0.91          | 0.74       | 1.42            |
|                 | 4             | 0.22       | 1.07         | 0.21          | 0.59        | 1.01          | 1.16       | 0.76            |
|                 | 5             | 0.79       | 0.63         | 1.16          | 1.11        | 0.85          | 1.01       | 1.40            |
|                 | 6             | 0.72       | 0.08         | 2.98          | 1.91        | 0.74          | 1.01       | 2.74            |
|                 | 7             | 0.96       | 0.62         | 0.30          | 0.16        | 0.80          | 0.88       | 0.10            |

|             |      |      |      |      |      |      |      |
|-------------|------|------|------|------|------|------|------|
| 8           | 1.24 | 0.45 | 0.05 | 0.66 | 0.84 | 0.86 | 0.19 |
| 9           | 1.53 | 1.28 | 1.57 | 1.84 | 1.29 | 1.73 | 1.16 |
| 10          | 0.97 | 1.26 | 1.61 | 1.58 | 1.36 | 1.43 | 1.44 |
| 11          | 0.87 | 1.11 | 2.25 | 1.14 | 1.04 | 1.52 | 1.12 |
| 12          | 1.74 | 0.91 | 2.08 | 1.32 | 1.40 | 3.46 | 1.13 |
| 13          | 0.90 | 0.52 | 0.60 | 0.90 | 0.91 | 0.86 | 0.69 |
| 14          | 0.93 | 1.09 | 1.31 | 1.25 | 1.34 | 1.14 | 1.53 |
| 15          | 0.62 | 0.84 | 0.94 | 0.26 | 0.92 | 1.05 | 0.02 |
| 16          | 0.84 | 0.58 | 0.50 | 0.99 | 1.06 | 0.85 | 1.09 |
| 17          | 1.10 | 0.91 | 1.06 | 1.27 | 1.18 | 1.34 | 1.34 |
| 18          | 0.80 | 1.11 | 0.82 | 0.93 | 1.14 | 1.22 | 1.17 |
| 19          | 0.60 | 0.64 | 1.70 | 0.69 | 0.63 | 0.99 | 1.06 |
| 20          | 0.47 | 1.41 | 1.95 | 1.56 | 1.17 | 1.86 | 1.40 |
| 21          | 0.27 | 0.74 | 0.31 | 0.42 | 0.48 | 1.39 | 1.87 |
| 22          | 0.49 | 0.53 | 0.15 | 1.02 | 1.01 | 0.90 | 1.66 |
| 23          | 0.69 | 0.85 | 1.56 | 1.42 | 1.08 | 1.40 | 1.75 |
| 24          | 0.46 | 0.77 | 1.83 | 0.98 | 0.63 | 1.07 | 0.83 |
| <b>Mean</b> | 0.78 | 0.83 | 1.14 | 1.03 | 0.97 | 1.27 | 1.15 |

| <b>Dataset</b>      | <b>System</b> | <b>M06-SX</b> | <b>M08-HX</b> | <b>M05-2X</b> | <b>PBE0</b> | <b>PBE</b> | <b>B3LYP</b> | <b>TPSS</b> |
|---------------------|---------------|---------------|---------------|---------------|-------------|------------|--------------|-------------|
| <b>Training set</b> | 1             | 1.34          | 1.38          | 1.52          | 4.65        | 5.50       | 6.29         | 7.22        |
|                     | 2             | 1.01          | 1.47          | 1.13          | 3.16        | 3.56       | 4.36         | 4.63        |
|                     | 3             | 1.63          | 2.80          | 1.95          | 4.54        | 4.71       | 6.11         | 6.07        |
|                     | 4             | 1.29          | 1.92          | 1.97          | 5.30        | 5.68       | 7.22         | 7.31        |
|                     | 5             | 1.12          | 1.01          | 1.54          | 5.10        | 5.88       | 7.10         | 7.92        |
|                     | 6             | 0.73          | 0.52          | 0.34          | 1.33        | 0.62       | 2.04         | 1.75        |
|                     | 7             | 1.19          | 1.02          | 1.08          | 3.49        | 4.28       | 5.06         | 5.49        |
|                     | 8             | 1.16          | 1.69          | 1.64          | 4.58        | 4.83       | 6.34         | 6.42        |
|                     | 9             | 2.17          | 1.42          | 2.25          | 5.79        | 6.75       | 8.03         | 8.76        |
|                     | 10            | 1.00          | 1.44          | 1.24          | 1.64        | 1.34       | 2.30         | 1.87        |
|                     | 11            | 1.60          | 0.87          | 1.69          | 5.72        | 6.28       | 8.01         | 8.66        |
|                     | 12            | 1.66          | 1.30          | 2.16          | 6.33        | 7.18       | 8.90         | 9.53        |
|                     | <b>Mean</b>   | 1.32          | 1.40          | 1.54          | 4.30        | 4.72       | 5.98         | 6.30        |
| <b>Test set</b>     | 1             | 1.20          | 1.41          | 1.26          | 3.38        | 3.87       | 4.76         | 4.99        |
|                     | 2             | 0.62          | 0.38          | 0.86          | 5.30        | 6.01       | 7.19         | 8.15        |
|                     | 3             | 1.35          | 0.97          | 1.73          | 5.45        | 6.31       | 7.81         | 8.33        |
|                     | 4             | 0.84          | 0.92          | 1.17          | 4.30        | 5.05       | 6.13         | 6.76        |
|                     | 5             | 1.28          | 1.15          | 1.26          | 3.91        | 4.16       | 5.57         | 5.59        |
|                     | 6             | 2.20          | 1.30          | 2.26          | 6.46        | 7.32       | 9.81         | 9.95        |
|                     | 7             | 0.42          | 1.09          | 0.77          | 1.61        | 1.48       | 2.27         | 2.00        |

---

|             |      |      |      |      |      |       |       |
|-------------|------|------|------|------|------|-------|-------|
| 8           | 0.68 | 1.55 | 1.06 | 3.28 | 3.38 | 4.81  | 4.82  |
| 9           | 1.39 | 2.00 | 1.42 | 4.24 | 4.71 | 6.02  | 6.53  |
| 10          | 1.47 | 1.43 | 1.71 | 4.75 | 5.52 | 6.57  | 7.29  |
| 11          | 1.06 | 1.48 | 0.84 | 1.95 | 2.17 | 2.96  | 3.09  |
| 12          | 1.34 | 1.83 | 1.44 | 2.17 | 2.11 | 3.46  | 3.24  |
| 13          | 0.97 | 1.20 | 1.20 | 3.16 | 3.36 | 4.57  | 4.54  |
| 14          | 1.50 | 1.32 | 1.69 | 4.02 | 4.44 | 5.69  | 5.94  |
| 15          | 0.43 | 0.93 | 1.08 | 3.45 | 3.60 | 4.67  | 4.87  |
| 16          | 1.28 | 1.62 | 1.46 | 4.69 | 5.45 | 6.72  | 7.03  |
| 17          | 1.39 | 1.67 | 1.42 | 3.73 | 3.98 | 5.17  | 5.21  |
| 18          | 1.13 | 0.98 | 1.40 | 3.69 | 4.04 | 5.19  | 5.45  |
| 19          | 0.94 | 1.14 | 0.80 | 2.63 | 3.00 | 4.39  | 4.28  |
| 20          | 1.33 | 0.90 | 1.16 | 3.88 | 4.33 | 5.33  | 5.95  |
| 21          | 1.34 | 0.55 | 1.50 | 6.32 | 6.95 | 9.46  | 9.08  |
| 22          | 1.78 | 1.66 | 2.38 | 7.40 | 8.27 | 10.24 | 10.53 |
| 23          | 1.62 | 1.04 | 1.81 | 5.33 | 6.18 | 7.84  | 8.14  |
| 24          | 0.72 | 0.74 | 0.55 | 1.63 | 1.88 | 2.57  | 2.72  |
| <b>Mean</b> | 1.18 | 1.22 | 1.34 | 4.03 | 4.48 | 5.80  | 6.02  |

---

Supplementary Table S6. Mean MUEs (kcal/mol) of 28 functionals for the amino-acid pair training and test sets.

| Functionals  | PpF    | $\omega$ B97X-V | PBE0-D3(BJ) | $\omega$ B97X-D | $\omega$ B97M-V | B3LYP-D3(BJ) | M06-2X-D3(0) |          |
|--------------|--------|-----------------|-------------|-----------------|-----------------|--------------|--------------|----------|
| Training set | 0.11   | 0.14            | 0.15        | 0.20            | 0.21            | 0.24         | 0.29         |          |
| Test set     | 0.10   | 0.17            | 0.22        | 0.20            | 0.15            | 0.24         | 0.30         |          |
| Functionals  | CF22D  | PBE-D3(BJ)      | M06-L-D3(0) | revM11          | PW6B95-D3(BJ)   | revM06       | TPSS-D3(BJ)  |          |
| Training set | 0.55   | 0.62            | 0.62        | 0.71            | 0.82            | 0.92         | 0.98         |          |
| Test set     | 0.60   | 0.40            | 0.51        | 0.60            | 0.80            | 0.78         | 0.72         |          |
| Functionals  | M11    | M06-L           | MN15-L      | MN15            | M06-2X          | M06          | revM06-L     |          |
| Training set | 1.01   | 1.03            | 1.14        | 1.19            | 1.23            | 1.26         | 1.29         |          |
| Test set     | 0.78   | 0.83            | 1.14        | 1.03            | 0.97            | 1.27         | 1.15         |          |
| Functionals  | M06-SX | M08-HX          | M05-2X      | PBE0            | PBE             | B3LYP        | TPSS         | Mean MUE |
| Training set | 1.32   | 1.40            | 1.54        | 4.30            | 4.72            | 5.98         | 6.30         | 1.44     |
| Test set     | 1.18   | 1.22            | 1.34        | 4.03            | 4.48            | 5.80         | 6.02         | 1.32     |

Supplementary Table S7. Computational time (single-core CPU) for 22 functionals on the ALA-VAL residue pair system.

| Rank | Functionals  | Time [h] | Rank | Functionals     | Time [h] |
|------|--------------|----------|------|-----------------|----------|
| 1    | PBE-D3(BJ)   | 5.196    | 12   | M06-2X          | 6.224    |
| 2    | PBE          | 5.228    | 13   | PW6B95-D3(BJ)   | 6.274    |
| 3    | TPSS         | 5.337    | 14   | CF22D           | 6.311    |
| 4    | TPSS-D3(BJ)  | 5.347    | 15   | M05-2X          | 6.321    |
| 5    | MN15-L       | 5.574    | 16   | M08-HX          | 6.364    |
| 6    | B3LYP        | 5.702    | 17   | M06-2X-D3(0)    | 6.390    |
| 7    | PBE0-D3(BJ)  | 5.799    | 18   | MN15            | 6.856    |
| 8    | PBE0         | 5.838    | 19   | PpF             | 6.939    |
| 9    | M06-L        | 5.854    | 20   | M06             | 7.088    |
| 10   | M06-L-D3(0)  | 5.867    | 21   | $\omega$ B97X-D | 8.381    |
| 11   | B3LYP-D3(BJ) | 5.879    | 22   | M11             | 10.128   |

**Supplementary Table S8. Interaction energies (kcal/mol) of 260 amino-acid pair systems calculated with the PpF functional.**

| System name | Energy | System name | Energy  | System name | Energy  | System name | Energy  |
|-------------|--------|-------------|---------|-------------|---------|-------------|---------|
| 1_ARG_GLU   | -64.09 | 66_LYS_ASP  | -220.25 | 131_VAL_VAL | -13.87  | 196_ARG_ASP | -95.59  |
| 2_GLN_ARG   | -21.39 | 67_TRP_LEU  | -4.60   | 132_PHE_LYS | -116.07 | 197_ARG_GLN | -20.14  |
| 3_VAL_ASP   | 32.85  | 68_TRP_ASP  | -83.56  | 133_VAL_ALA | -15.22  | 198_GLU_LYS | -129.05 |
| 4_THR_LEU   | -18.12 | 69_TRP_VAL  | -0.13   | 134_PHE_SER | -6.02   | 199_GLU_ARG | -61.57  |
| 5_ASN_ASN   | -16.10 | 70_ALA_ILE  | -39.75  | 135_THR_ASN | -21.64  | 200_ASP_ARG | -164.97 |
| 6_ASP_ARG   | -57.51 | 71_TRP_MET  | -20.26  | 136_PHE_ASN | -24.31  | 201_ILE_GLU | -35.68  |
| 7_ASP_LYS   | -86.35 | 72_ALA_TYR  | -8.49   | 137_THR_SER | -11.06  | 202_LEU_GLU | -31.43  |
| 8_ASP_GLY   | -28.14 | 73_LEU_ARG  | -26.53  | 138_THR_SER | -33.77  | 203_ARG_ASP | -118.88 |
| 9_VAL_LEU   | -41.40 | 74_THR_LYS  | -25.59  | 139_LYS_ASN | -21.01  | 204_PHE_ILE | -16.73  |
| 10_ASN_SER  | -23.92 | 75_ARG_ARG  | 29.70   | 140_LYS_TYR | -13.54  | 205_ARG_GLU | -117.84 |
| 11_TYR_SER  | 1.36   | 76_ILE_LEU  | -5.67   | 141_LYS_ARG | -55.17  | 206_SER_VAL | -16.42  |
| 12_TYR_SER  | -6.58  | 77_ILE_GLU  | -101.64 | 142_LYS_GLY | -5.75   | 207_THR_ALA | -10.05  |
| 13_ARG_TYR  | -14.42 | 78_ILE_TYR  | 6.15    | 143_PHE_MET | -21.35  | 208_ARG_TRP | -7.25   |
| 14_PRO_TYR  | -11.16 | 79_ALA_TYR  | -7.40   | 144_PHE_GLN | -12.65  | 209_GLN_THR | -14.23  |

|            |        |            |        |             |         |             |        |
|------------|--------|------------|--------|-------------|---------|-------------|--------|
| 15_TYR_ARG | -16.87 | 80_GLY_GLY | -8.86  | 145_ASP_LEU | 6.50    | 210_GLN_HIE | -8.22  |
| 16_ASP_SER | -38.07 | 81_ALA_THR | -6.03  | 146_ASP_HID | -22.12  | 211_THR_GLY | -7.05  |
| 17_LEU_LEU | -42.72 | 82_SER_HID | -16.44 | 147_ASP_ARG | -105.82 | 212_THR_ARG | -6.66  |
| 18_LEU_ILE | -12.05 | 83_LYS_VAL | -16.24 | 148_ASP_HIE | -21.97  | 213_TYR_ILE | -16.72 |
| 19_LEU_ILE | -12.96 | 84_THR_GLY | -11.18 | 149_LEU_ASN | -16.61  | 214_SER_VAL | -1.97  |
| 20_ILE_LEU | -44.24 | 85_THR_SER | -15.38 | 150_GLY_TRP | -16.39  | 215_TRP_GLY | -12.41 |
| 21_TYR_LEU | -8.63  | 86_ASP_ILE | -26.75 | 151_ASP_LYS | -122.40 | 216_PHE_TRP | -10.33 |
| 22_ARG_TYR | -26.88 | 87_GLN_SER | -22.29 | 152_ALA_SER | -6.56   | 217_GLU_ARG | -83.19 |
| 23_ILE_GLY | -37.45 | 88_ILE_TYR | -9.36  | 153_ALA_ASN | -6.98   | 218_PRO_TYR | -25.70 |
| 24_ILE_PHE | -17.17 | 89_GLN_THR | -9.46  | 154_ILE_ASP | -28.43  | 219_PRO_ALA | -17.10 |
| 25_GLU_SER | -24.92 | 90_ILE_LYS | -17.04 | 155_ASP_LYS | -76.70  | 220_ILE_ALA | -14.64 |
| 26_GLU_LYS | -75.12 | 91_LEU_GLU | -19.71 | 156_PRO_ARG | -27.03  | 221_GLY_PHE | -15.67 |
| 27_TYR_TYR | -6.83  | 92_LEU_VAL | -10.84 | 157_GLU_ASN | -27.64  | 222_GLN_ARG | -5.84  |
| 28_ASN_LYS | 51.07  | 93_LEU_TYR | -8.85  | 158_VAL_THR | -9.74   | 223_GLN_HID | 3.94   |
| 29_TYR_ALA | -31.59 | 94_LEU_THR | -11.36 | 159_VAL_VAL | -10.22  | 224_GLN_SER | -9.89  |
| 30_GLU_TYR | -27.65 | 95_LEU_MET | -13.87 | 160_VAL_VAL | -15.40  | 225_GLN_HIE | -17.94 |

|            |        |             |        |             |         |             |         |
|------------|--------|-------------|--------|-------------|---------|-------------|---------|
| 31_SER_VAL | -14.55 | 96_ARG_MET  | -23.99 | 161_ALA_VAL | -9.92   | 226_GLN_SER | -32.83  |
| 32_ILE_SER | -16.08 | 97_ALA_LEU  | -9.51  | 162_THR_ALA | -9.11   | 227_ALA_SER | -20.32  |
| 33_GLN_ARG | -19.67 | 98_VAL_TRP  | -15.04 | 163_GLN_THR | -1.05   | 228_TRP_MET | -12.30  |
| 34_PRO_PHE | -26.13 | 99_ALA_GLU  | 23.36  | 164_LYS_CYS | -21.51  | 229_SER_THR | -27.00  |
| 35_GLN_ASP | -27.60 | 100_ALA_TRP | -6.81  | 165_LYS_GLN | -27.01  | 230_GLY_ARG | -119.64 |
| 36_TYR_GLY | -9.88  | 101_ARG_GLN | 1.00   | 166_LYS_ASP | -108.90 | 231_GLY_ASN | -31.29  |
| 37_VAL_GLY | -14.44 | 102_ARG_PHE | -8.43  | 167_LYS_GLN | -31.83  | 232_ASN_VAL | 5.16    |
| 38_PRO_ARG | -27.34 | 103_LEU_ASN | -4.30  | 168_ARG_GLY | -13.73  | 233_ASN_ILE | -8.14   |
| 39_ILE_VAL | -9.71  | 104_LEU_PHE | -1.00  | 169_GLN_HID | -6.60   | 234_ASN_GLY | -8.19   |
| 40_ASN_THR | -10.02 | 105_LEU_ASN | -4.04  | 170_GLY_ARG | 19.22   | 235_ASN_PRO | -17.44  |
| 41_ASN_GLY | -15.31 | 106_ILE_ASN | -10.69 | 171_GLN_MET | -6.82   | 236_VAL_TYR | -5.27   |
| 42_ARG_VAL | -12.00 | 107_ILE_PHE | -1.77  | 172_ASN_TRP | -13.48  | 237_VAL_TYR | -12.48  |
| 43_LYS_TYR | -18.27 | 108_ILE_GLN | -3.54  | 173_ASN_HIE | -7.44   | 238_VAL_SER | -34.70  |
| 44_ASP_ASN | -27.54 | 109_PHE_TYR | -2.07  | 174_ILE_MET | -15.49  | 239_VAL_GLY | -30.25  |
| 45_LYS_ASN | -14.39 | 110_PHE_ASN | -1.19  | 175_ILE_ARG | -16.07  | 240_VAL_ILE | -11.17  |
| 46_LEU_LYS | -31.80 | 111_PHE_GLU | -9.88  | 176_LYS_GLY | -5.57   | 241_VAL_VAL | -4.27   |

|            |         |             |        |             |         |             |        |
|------------|---------|-------------|--------|-------------|---------|-------------|--------|
| 47_LEU_GLY | -33.06  | 112_PHE_TYR | -1.62  | 177_VAL_ALA | -12.78  | 242_ASN_GLN | -6.80  |
| 48_LEU_PHE | -14.28  | 113_ARG_GLN | -6.26  | 178_LYS_ASP | -125.30 | 243_ASN_ASP | -30.84 |
| 49_VAL_PHE | -10.70  | 114_ILE_PRO | -4.88  | 179_LEU_MET | -17.05  | 244_ARG_LEU | -5.16  |
| 50_GLU_ARG | -122.46 | 115_SER_TYR | -13.28 | 180_LEU_ILE | -14.94  | 245_SER_HID | 8.48   |
| 51_GLU_TRP | -13.09  | 116_VAL_GLN | -14.91 | 181_ALA_ILE | -41.62  | 246_SER_ARG | -8.31  |
| 52_LEU_SER | -10.07  | 117_GLU_TRP | -4.94  | 182_ALA_GLY | -36.82  | 247_CYS_LEU | -37.66 |
| 53_LEU_SER | -22.79  | 118_PRO_THR | -1.84  | 183_ALA_ALA | -17.93  | 248_CYS_GLY | -35.87 |
| 54_LEU_LYS | -133.74 | 119_PRO_THR | -2.07  | 184_ALA_GLN | -6.84   | 249_CYS_ILE | -19.14 |
| 55_LEU_ASN | -28.34  | 120_PRO_PRO | -0.66  | 185_ILE_ILE | -18.45  | 250_VAL_VAL | 1.01   |
| 56_LEU_TYR | -31.58  | 121_PRO_PHE | -5.12  | 186_PHE_ALA | -13.87  | 251_VAL_LEU | -3.02  |
| 57_LYS_TYR | -18.32  | 122_PRO_THR | -8.08  | 187_ARG_THR | -15.28  | 252_GLU_GLN | -15.20 |
| 58_TRP_LEU | 0.20    | 123_TYR_HIE | -8.48  | 188_VAL_VAL | -11.92  | 253_GLY_ILE | -12.53 |
| 59_ALA_GLU | -92.70  | 124_TYR_LYS | -12.49 | 189_VAL_GLY | 7.45    | 254_LEU_GLY | -17.79 |
| 60_SER_LEU | -9.10   | 125_TYR_THR | -6.45  | 190_LEU_HIE | -11.96  | 255_PRO_ASN | -10.29 |
| 61_ASN_TYR | -3.87   | 126_SER_ASN | -15.48 | 191_ALA_GLN | -32.00  | 256_VAL_TYR | -12.03 |
| 62_PRO_ASP | -97.99  | 127_ALA_SER | -7.96  | 192_GLN_ARG | -11.84  | 257_ARG_GLN | -16.18 |

|            |         |             |        |             |        |             |         |
|------------|---------|-------------|--------|-------------|--------|-------------|---------|
| 63_SER_VAL | -25.41  | 128_VAL_ARG | -88.12 | 193_ASN_ASP | -83.86 | 258_ALA_TRP | -9.27   |
| 64_ALA_HID | -153.84 | 129_VAL_PHE | -9.36  | 194_LEU_VAL | -13.83 | 259_LEU_GLU | -43.67  |
| 65_ALA_GLU | -82.80  | 130_VAL_ILE | -9.11  | 195_VAL_VAL | -16.22 | 260_ARG_GLU | -164.61 |

---

**Supplementary Table S9. MUEs (kcal/mol) of 23 functionals for the SCAI dataset.**

|                    |                                  |                                   |                      |                    |                    |                     |
|--------------------|----------------------------------|-----------------------------------|----------------------|--------------------|--------------------|---------------------|
| <b>Functionals</b> | <b>PpF</b>                       | <b>CF22D</b>                      | <b>PW6B95-D3(BJ)</b> | <b>MN15</b>        | <b>M06-L-D3(0)</b> | <b>M06-SX</b>       |
| <b>MUE</b>         | 1.28                             | 1.29                              | 1.38                 | 1.39               | 1.46               | 1.47                |
| <b>Functionals</b> | <b>revM06</b>                    | <b>M06</b>                        | <b>M06-2X-D3(0)</b>  | <b>PBE0-D3(BJ)</b> | <b>revM11</b>      | <b>B3LYP-D3(BJ)</b> |
| <b>MUE</b>         | 1.48                             | 1.49                              | 1.50                 | 1.52               | 1.61               | 1.63                |
| <b>Functionals</b> | <b><math>\omega</math>B97M-V</b> | <b><math>\omega</math> B97X-D</b> | <b>MN15-L</b>        | <b>M06-2X</b>      | <b>TPSS-D3(BJ)</b> | <b>M08-HX</b>       |
| <b>MUE</b>         | 1.65                             | 1.77                              | 1.84                 | 1.84               | 1.90               | 1.97                |
| <b>Functionals</b> | <b>M05-2X</b>                    | <b><math>\omega</math>B97X-V</b>  | <b>M06-L</b>         | <b>M11</b>         | <b>revM06-L</b>    | <b>Mean MUE</b>     |
| <b>MUE</b>         | 1.99                             | 2.45                              | 2.52                 | 2.70               | 3.49               | 1.81                |

Supplementary Table S10. MUEs (kcal/mol) of 24 functionals for the 4 datasets of JSCH database.

| Dataset                    | CF22D | PpF  | M06-2X | $\omega$ B97X-V | M06-L-D3(0) | M08-HX | M06  |
|----------------------------|-------|------|--------|-----------------|-------------|--------|------|
| <b>Hydrogen-bonded DNA</b> | 0.39  | 0.45 | 0.63   | 0.48            | 0.65        | 0.46   | 0.72 |
| <b>Interstrand</b>         | 0.60  | 0.58 | 0.84   | 0.67            | 0.63        | 1.04   | 1.05 |
| <b>Stacked</b>             | 0.47  | 0.53 | 0.67   | 0.98            | 0.54        | 0.80   | 0.86 |
| <b>Amino</b>               | 2.03  | 2.56 | 1.73   | 1.70            | 2.88        | 2.48   | 1.76 |
| <b>JSCH</b>                | 0.69  | 0.79 | 0.84   | 0.88            | 0.90        | 0.99   | 0.99 |

  

| Dataset                    | M06-SX | revM06 | M06-2X-D3(0) | $\omega$ B97M-V | revM11 | MN15 | $\omega$ B97X-D |
|----------------------------|--------|--------|--------------|-----------------|--------|------|-----------------|
| <b>Hydrogen-bonded DNA</b> | 1.40   | 1.22   | 0.41         | 0.58            | 0.46   | 0.81 | 1.04            |
| <b>Interstrand</b>         | 0.88   | 0.85   | 0.63         | 0.68            | 0.77   | 0.72 | 0.70            |
| <b>Stacked</b>             | 0.49   | 0.47   | 1.26         | 1.35            | 1.07   | 1.32 | 1.09            |
| <b>Amino</b>               | 1.86   | 2.33   | 2.12         | 1.85            | 2.81   | 2.19 | 2.54            |
| <b>JSCH</b>                | 1.00   | 1.00   | 1.01         | 1.06            | 1.08   | 1.17 | 1.18            |

| <b>Dataset</b>             | <b>M11</b> | <b>PBE0-D3(BJ)</b> | <b>M06-L</b> | <b>revM06-L</b> | <b>M05-2X</b> | <b>B3LYP-D3(BJ)</b> |
|----------------------------|------------|--------------------|--------------|-----------------|---------------|---------------------|
| <b>Hydrogen-bonded DNA</b> | 0.56       | 1.76               | 1.14         | 2.31            | 0.85          | 1.69                |
| <b>Interstrand</b>         | 1.11       | 0.73               | 1.00         | 0.83            | 0.94          | 0.68                |
| <b>Stacked</b>             | 0.83       | 0.47               | 0.86         | 0.52            | 1.27          | 0.91                |
| <b>Amino</b>               | 3.59       | 3.12               | 2.81         | 2.14            | 3.01          | 3.67                |
| <b>JSCH</b>                | 1.19       | 1.22               | 1.22         | 1.27            | 1.32          | 1.43                |

| <b>Dataset</b>             | <b>TPSS-D3(BJ)</b> | <b>MN15-L</b> | <b>PW6B95-D3(BJ)</b> | <b>B3LYP</b> | <b>Number</b> | <b>Mean MUE</b> |
|----------------------------|--------------------|---------------|----------------------|--------------|---------------|-----------------|
| <b>Hydrogen-bonded DNA</b> | 1.24               | 3.97          | 0.43                 | 2.84         | 38            | 1.10            |
| <b>Interstrand</b>         | 0.78               | 0.92          | 0.62                 | 2.31         | 32            | 0.86            |
| <b>Stacked</b>             | 0.49               | 3.50          | 0.84                 | 8.43         | 54            | 1.25            |
| <b>Amino</b>               | 14.41              | 4.06          | 20.07                | 7.18         | 19            | 3.95            |
| <b>JSCH</b>                | 2.61               | 3.12          | 3.26                 | 5.43         | 143           | 1.49            |

**Supplementary Table S11. MUEs (kcal/mol) of 28 functionals for the 35 datasets of MGCDB84\_NC database.**

| Database | Dataset      | $\omega$ B97M-V | $\omega$ B97X-V | PpF  | CF22D | $\omega$ B97X-D | M06-L-D3(0) | M11-D3(BJ) |
|----------|--------------|-----------------|-----------------|------|-------|-----------------|-------------|------------|
| NCED     | A24          | 0.07            | 0.05            | 0.13 | 0.13  | 0.13            | 0.26        | 0.24       |
|          | DS14         | 0.13            | 0.09            | 0.17 | 0.18  | 0.21            | 0.27        | 0.29       |
|          | HB15         | 0.17            | 0.22            | 0.33 | 0.38  | 0.35            | 0.39        | 0.36       |
|          | HSG          | 0.09            | 0.12            | 0.15 | 0.15  | 0.27            | 0.25        | 0.32       |
|          | NBC10        | 0.10            | 0.18            | 0.36 | 0.37  | 0.17            | 0.21        | 0.19       |
|          | S22          | 0.21            | 0.20            | 0.38 | 0.54  | 0.19            | 0.39        | 0.40       |
|          | X40          | 0.18            | 0.19            | 0.24 | 0.27  | 0.47            | 0.40        | 0.37       |
|          | A21x12       | 0.03            | 0.02            | 0.07 | 0.05  | 0.05            | 0.11        | 0.09       |
|          | BzDC215      | 0.14            | 0.15            | 0.19 | 0.16  | 0.22            | 0.19        | 0.33       |
|          | HW30         | 0.13            | 0.11            | 0.16 | 0.20  | 0.27            | 0.38        | 0.29       |
|          | NC15         | 0.04            | 0.04            | 0.08 | 0.06  | 0.13            | 0.20        | 0.16       |
|          | S66          | 0.12            | 0.09            | 0.19 | 0.29  | 0.30            | 0.34        | 0.33       |
|          | S66x8        | 0.07            | 0.12            | 0.15 | 0.20  | 0.21            | 0.29        | 0.27       |
|          | 3B-69-DIM    | 0.12            | 0.14            | 0.33 | 0.31  | 0.26            | 0.35        | 0.36       |
|          | AlkBind12    | 0.12            | 0.10            | 0.16 | 0.17  | 0.86            | 0.54        | 0.53       |
|          | CO2Nitrogen1 | 0.07            | 0.09            | 0.46 | 0.49  | 0.80            | 0.84        | 0.29       |
|          | HB49         | 0.18            | 0.20            | 0.29 | 0.30  | 0.30            | 0.48        | 0.42       |
|          | Ionic43      | 0.51            | 0.61            | 0.63 | 0.50  | 0.79            | 0.78        | 1.09       |

|                     | <b>Mean</b> | 0.10 | 0.13 | 0.21 | 0.22 | 0.23 | 0.28 | 0.29 |
|---------------------|-------------|------|------|------|------|------|------|------|
| <b>NCEC</b>         | H2O6Bind8   | 0.29 | 0.43 | 0.32 | 0.19 | 0.83 | 0.91 | 0.55 |
|                     | HW6Cl       | 0.18 | 0.32 | 0.81 | 0.71 | 0.36 | 0.96 | 0.98 |
|                     | HW6F        | 0.12 | 0.11 | 1.84 | 1.12 | 0.45 | 1.25 | 1.80 |
|                     | FmH2O10     | 0.42 | 0.13 | 4.96 | 2.13 | 2.85 | 4.85 | 2.99 |
|                     | Shields38   | 0.40 | 0.59 | 0.82 | 0.59 | 0.59 | 0.76 | 0.53 |
|                     | SW49Bind345 | 0.22 | 0.25 | 0.16 | 0.22 | 0.61 | 0.39 | 0.50 |
|                     | SW49Bind6   | 0.59 | 0.61 | 0.08 | 0.63 | 0.49 | 0.41 | 1.16 |
|                     | WATER27     | 0.43 | 0.80 | 0.85 | 0.84 | 0.54 | 0.88 | 0.86 |
|                     | 3B-69-TRIM  | 0.27 | 0.31 | 0.67 | 0.88 | 0.65 | 0.79 | 0.76 |
|                     | CE20        | 0.42 | 0.38 | 0.57 | 0.47 | 0.32 | 0.81 | 1.05 |
|                     | H2O20Bind10 | 0.96 | 1.17 | 1.23 | 3.78 | 1.92 | 1.64 | 6.03 |
|                     | H2O20Bind4  | 1.05 | 1.85 | 2.32 | 1.41 | 0.96 | 3.21 | 5.76 |
|                     | <b>Mean</b> | 0.38 | 0.47 | 0.84 | 0.85 | 0.73 | 0.98 | 1.17 |
| <b>NCD</b>          | TA13        | 1.67 | 1.75 | 2.02 | 1.63 | 2.03 | 2.73 | 1.14 |
|                     | XB18        | 0.40 | 0.49 | 0.31 | 0.29 | 0.97 | 0.36 | 0.97 |
|                     | Bauza30     | 0.45 | 0.66 | 0.69 | 0.44 | 1.14 | 1.39 | 0.72 |
|                     | CT20        | 0.07 | 0.08 | 0.11 | 0.11 | 0.43 | 0.31 | 0.41 |
|                     | XB51        | 0.46 | 0.53 | 0.42 | 0.34 | 0.84 | 0.63 | 1.00 |
|                     | <b>Mean</b> | 0.54 | 0.64 | 0.66 | 0.50 | 1.03 | 1.09 | 0.80 |
| <b>Overall mean</b> | 0.16        | 0.19 | 0.31 | 0.31 | 0.32 | 0.40 | 0.41 |      |

| <b>Database</b> | <b>Dataset (3</b> | <b>MN15-D3(BJ)</b> | <b>MN15</b> | <b>B3LYP-D3(BJ)</b> | <b>M06-2X-D3(0)</b> | <b>PW6B95-D3(BJ)</b> | <b>TPSS-D3(BJ)</b> | <b>M06-D3(0)</b> |
|-----------------|-------------------|--------------------|-------------|---------------------|---------------------|----------------------|--------------------|------------------|
| <b>NCED</b>     | A24               | 0.20               | 0.19        | 0.12                | 0.16                | 0.09                 | 0.11               | 0.16             |
|                 | DS14              | 0.20               | 0.20        | 0.19                | 0.15                | 0.15                 | 0.17               | 0.17             |
|                 | HB15              | 0.49               | 0.50        | 0.60                | 0.28                | 0.27                 | 0.57               | 0.32             |
|                 | HSG               | 0.22               | 0.22        | 0.14                | 0.17                | 0.24                 | 0.18               | 0.33             |
|                 | NBC10             | 0.27               | 0.28        | 0.19                | 0.19                | 0.22                 | 0.25               | 0.37             |
|                 | S22               | 0.57               | 0.57        | 0.30                | 0.33                | 0.36                 | 0.30               | 0.30             |
|                 | X40               | 0.27               | 0.27        | 0.22                | 0.19                | 0.24                 | 0.32               | 0.38             |
|                 | A21x12            | 0.09               | 0.09        | 0.05                | 0.08                | 0.07                 | 0.08               | 0.11             |
|                 | BzDC215           | 0.42               | 0.42        | 0.14                | 0.27                | 0.27                 | 0.22               | 0.23             |
|                 | HW30              | 0.32               | 0.31        | 0.18                | 0.28                | 0.10                 | 0.19               | 0.28             |
|                 | NC15              | 0.09               | 0.09        | 0.07                | 0.11                | 0.10                 | 0.13               | 0.19             |
|                 | S66               | 0.53               | 0.52        | 0.25                | 0.25                | 0.27                 | 0.27               | 0.49             |
|                 | S66x8             | 0.35               | 0.35        | 0.18                | 0.20                | 0.22                 | 0.24               | 0.37             |
|                 | 3B-69-DIM         | 0.31               | 0.33        | 0.22                | 0.22                | 0.23                 | 0.29               | 0.29             |
|                 | AlkBind12         | 1.07               | 1.03        | 0.14                | 0.36                | 0.26                 | 0.30               | 1.38             |
|                 | CO2Nitrog         | 0.30               | 0.32        | 0.06                | 0.12                | 0.36                 | 0.54               | 0.62             |
|                 | HB49              | 0.42               | 0.42        | 0.42                | 0.30                | 0.42                 | 0.60               | 0.34             |
| Ionic43         | 0.56              | 0.56               | 0.64        | 0.79                | 0.81                | 0.63                 | 0.48               |                  |
| <b>Mean</b>     |                   | 0.32               | 0.32        | 0.19                | 0.21                | 0.23                 | 0.25               | 0.31             |
| <b>NCEC</b>     | H2O6Bind8         | 0.38               | 0.40        | 2.35                | 1.91                | 1.07                 | 1.25               | 0.80             |

|                     |             |      |      |       |      |       |      |      |
|---------------------|-------------|------|------|-------|------|-------|------|------|
|                     | HW6C1       | 1.86 | 1.85 | 0.89  | 2.70 | 0.56  | 0.62 | 1.57 |
|                     | HW6F        | 2.15 | 2.13 | 0.32  | 4.03 | 0.97  | 1.34 | 1.61 |
|                     | FmH2O10     | 3.49 | 3.40 | 2.60  | 9.86 | 4.36  | 1.09 | 7.34 |
|                     | Shields38   | 0.53 | 0.49 | 2.85  | 2.13 | 1.77  | 2.45 | 0.85 |
|                     | SW49Bind    | 0.16 | 0.16 | 0.68  | 0.59 | 1.05  | 0.67 | 0.85 |
|                     | SW49Bind    | 0.40 | 0.44 | 1.40  | 1.31 | 2.71  | 0.73 | 1.59 |
|                     | WATER27     | 0.91 | 0.89 | 2.35  | 2.70 | 1.33  | 2.66 | 1.20 |
|                     | 3B-69-      | 0.88 | 0.80 | 0.59  | 0.49 | 0.60  | 0.70 | 0.70 |
|                     | CE20        | 0.77 | 0.78 | 1.62  | 1.13 | 1.00  | 1.81 | 0.56 |
|                     | H2O20Bind   | 6.41 | 6.71 | 8.84  | 7.51 | 11.61 | 0.87 | 3.42 |
|                     | H2O20Bind   | 1.67 | 1.97 | 11.90 | 6.77 | 10.31 | 9.85 | 3.97 |
|                     | <b>Mean</b> | 1.08 | 1.07 | 1.93  | 2.05 | 1.89  | 1.45 | 1.33 |
| <b>NCD</b>          | TA13        | 1.57 | 1.57 | 2.73  | 1.07 | 1.99  | 3.84 | 1.80 |
|                     | XB18        | 0.25 | 0.25 | 0.28  | 0.51 | 0.28  | 0.79 | 0.30 |
|                     | Bauza30     | 0.63 | 0.62 | 1.30  | 0.94 | 1.55  | 2.65 | 1.59 |
|                     | CT20        | 0.15 | 0.15 | 0.22  | 0.15 | 0.08  | 0.25 | 0.47 |
|                     | XB51        | 0.42 | 0.43 | 0.70  | 0.50 | 0.41  | 1.40 | 0.44 |
|                     | <b>Mean</b> | 0.58 | 0.58 | 1.05  | 0.65 | 0.93  | 1.85 | 1.01 |
| <b>Overall mean</b> |             | 0.42 | 0.42 | 0.43  | 0.45 | 0.45  | 0.46 | 0.46 |

| <b>Database</b> | <b>Dataset</b> | <b>M06-2X</b> | <b>M08-HX</b> | <b>M05-2X-D3(0)</b> | <b>M06-L</b> | <b>M05-2X</b> | <b>PBE0-D3(BJ)</b> | <b>M11</b> | <b>M06</b> |
|-----------------|----------------|---------------|---------------|---------------------|--------------|---------------|--------------------|------------|------------|
| <b>NCED</b>     | A24            | 0.20          | 0.16          | 0.20                | 0.33         | 0.21          | 0.20               | 0.33       | 0.34       |
|                 | DS14           | 0.20          | 0.15          | 0.16                | 0.40         | 0.27          | 0.28               | 0.51       | 0.49       |
|                 | HB15           | 0.28          | 0.39          | 0.43                | 0.47         | 0.35          | 0.89               | 0.46       | 0.54       |
|                 | HSG            | 0.48          | 0.59          | 0.25                | 0.59         | 0.56          | 0.14               | 0.85       | 0.68       |
|                 | NBC10          | 0.44          | 0.55          | 0.22                | 0.51         | 0.89          | 0.15               | 0.73       | 0.74       |
|                 | S22            | 0.38          | 0.46          | 0.34                | 0.73         | 0.79          | 0.45               | 0.70       | 1.02       |
|                 | X40            | 0.27          | 0.40          | 0.27                | 0.53         | 0.41          | 0.30               | 0.62       | 0.69       |
|                 | A21x12         | 0.06          | 0.09          | 0.09                | 0.15         | 0.08          | 0.10               | 0.11       | 0.12       |
|                 | BzDC215        | 0.22          | 0.35          | 0.34                | 0.27         | 0.25          | 0.28               | 0.21       | 0.36       |
|                 | HW30           | 0.29          | 0.25          | 0.33                | 0.46         | 0.25          | 0.25               | 0.32       | 0.42       |
|                 | NC15           | 0.11          | 0.12          | 0.08                | 0.21         | 0.09          | 0.12               | 0.18       | 0.22       |
|                 | S66            | 0.26          | 0.31          | 0.24                | 0.55         | 0.57          | 0.29               | 0.54       | 0.69       |
|                 | S66x8          | 0.30          | 0.43          | 0.25                | 0.44         | 0.45          | 0.27               | 0.47       | 0.59       |
|                 | 3B-69-DIM      | 0.43          | 0.61          | 0.21                | 0.61         | 0.48          | 0.29               | 0.74       | 0.81       |
|                 | AlkBind12      | 0.25          | 0.22          | 0.24                | 0.31         | 0.93          | 0.10               | 0.41       | 0.39       |
|                 | CO2Nitrogen1   | 0.29          | 0.50          | 0.16                | 1.13         | 0.58          | 0.28               | 0.84       | 1.39       |
| HB49            | 0.35           | 0.38          | 0.36          | 0.60                | 0.41         | 0.61          | 0.54               | 0.63       |            |
| Ionic43         | 0.83           | 1.01          | 1.18          | 0.73                | 1.31         | 0.94          | 1.21               | 0.58       |            |
| <b>Mean</b>     |                | 0.30          | 0.40          | 0.26                | 0.43         | 0.44          | 0.27               | 0.47       | 0.54       |
| <b>NCEC</b>     | H2O6Bind8      | 1.47          | 0.56          | 2.93                | 1.19         | 1.87          | 3.92               | 0.87       | 1.46       |

|                     |             |      |      |       |      |      |       |      |       |
|---------------------|-------------|------|------|-------|------|------|-------|------|-------|
|                     | HW6C1       | 2.56 | 2.09 | 2.72  | 0.81 | 2.27 | 2.45  | 0.73 | 0.78  |
|                     | HW6F        | 3.88 | 1.82 | 4.39  | 1.08 | 3.92 | 2.21  | 1.55 | 0.88  |
|                     | FmH2O10     | 8.51 | 2.95 | 10.45 | 3.28 | 7.28 | 7.28  | 1.56 | 2.57  |
|                     | Shields38   | 1.62 | 0.42 | 3.10  | 1.21 | 1.84 | 3.86  | 0.96 | 1.58  |
|                     | SW49Bind345 | 0.47 | 0.52 | 0.42  | 0.35 | 0.05 | 0.77  | 0.76 | 0.32  |
|                     | SW49Bind6   | 0.88 | 1.12 | 1.00  | 0.28 | 0.14 | 1.61  | 1.87 | 0.36  |
|                     | WATER27     | 2.38 | 0.89 | 3.42  | 1.09 | 2.62 | 3.65  | 0.98 | 1.37  |
|                     | 3B-69-TRIM  | 1.12 | 1.68 | 0.56  | 1.47 | 1.31 | 0.71  | 1.94 | 2.13  |
|                     | CE20        | 1.16 | 0.34 | 1.56  | 1.10 | 1.51 | 2.30  | 1.31 | 1.32  |
|                     | H2O20Bind10 | 3.35 | 3.86 | 11.47 | 6.24 | 3.05 | 13.61 | 9.83 | 8.31  |
|                     | H2O20Bind4  | 2.71 | 4.67 | 12.08 | 7.52 | 3.97 | 14.75 | 9.36 | 10.69 |
|                     | <b>Mean</b> | 1.76 | 1.28 | 2.60  | 1.47 | 1.75 | 2.90  | 1.84 | 1.87  |
| <b>NCD</b>          | TA13        | 1.06 | 1.04 | 1.64  | 2.72 | 1.60 | 2.45  | 1.13 | 1.77  |
|                     | XB18        | 0.55 | 0.74 | 0.45  | 0.36 | 0.52 | 0.29  | 1.17 | 0.32  |
|                     | Bauza30     | 0.93 | 0.89 | 1.51  | 1.38 | 1.49 | 2.43  | 0.88 | 1.52  |
|                     | CT20        | 0.20 | 0.31 | 0.10  | 0.35 | 0.12 | 0.18  | 0.49 | 0.64  |
|                     | XB51        | 0.56 | 0.66 | 0.43  | 0.65 | 0.53 | 0.71  | 1.28 | 0.51  |
|                     | <b>Mean</b> | 0.67 | 0.72 | 0.89  | 1.09 | 0.91 | 1.37  | 0.94 | 1.03  |
| <b>Overall mean</b> |             | 0.48 | 0.52 | 0.56  | 0.58 | 0.62 | 0.62  | 0.66 | 0.72  |

| Database    | Dataset       | PBE-D3(BJ) | PBE0 | PBE  | MN15-L | TPSS | B3LYP | Number | Mean MUE |
|-------------|---------------|------------|------|------|--------|------|-------|--------|----------|
| <b>NCED</b> | A24           | 0.31       | 0.46 | 0.39 | 0.42   | 0.82 | 0.97  | 24     | 0.26     |
|             | DS14          | 0.40       | 0.86 | 0.79 | 0.60   | 1.43 | 1.67  | 14     | 0.39     |
|             | HB15          | 0.80       | 0.48 | 0.67 | 2.15   | 1.10 | 1.15  | 15     | 0.55     |
|             | HSG           | 0.21       | 1.67 | 1.64 | 0.66   | 2.40 | 2.58  | 21     | 0.58     |
|             | NBC10         | 0.15       | 2.37 | 2.35 | 0.94   | 2.97 | 3.50  | 184    | 0.71     |
|             | S22           | 0.43       | 2.40 | 2.61 | 1.95   | 3.51 | 3.78  | 22     | 0.88     |
|             | X40           | 0.35       | 1.25 | 1.22 | 0.91   | 1.77 | 1.93  | 31     | 0.53     |
|             | A21x12        | 0.13       | 0.14 | 0.13 | 0.17   | 0.25 | 0.34  | 252    | 0.11     |
|             | BzDC215       | 0.22       | 0.81 | 0.89 | 0.61   | 1.25 | 1.61  | 215    | 0.39     |
|             | HW30          | 0.29       | 0.42 | 0.44 | 0.45   | 0.92 | 1.02  | 30     | 0.33     |
|             | NC15          | 0.21       | 0.11 | 0.14 | 0.06   | 0.18 | 0.27  | 15     | 0.13     |
|             | S66           | 0.30       | 2.07 | 2.17 | 1.85   | 3.08 | 3.26  | 66     | 0.73     |
|             | S66x8         | 0.28       | 1.50 | 1.56 | 1.14   | 2.17 | 2.39  | 528    | 0.55     |
|             | 3B-69-DIM     | 0.30       | 1.32 | 1.38 | 0.89   | 1.93 | 2.01  | 207    | 0.56     |
|             | AlkBind12     | 0.11       | 3.37 | 3.36 | 3.18   | 4.67 | 4.96  | 12     | 1.05     |
|             | CO2Nitrogen16 | 0.39       | 2.42 | 2.57 | 0.64   | 3.40 | 3.36  | 16     | 0.83     |
| HB49        | 0.88          | 0.72       | 0.83 | 1.71 | 1.13   | 1.15 | 49    | 0.55   |          |
| Ionic43     | 0.95          | 1.24       | 1.08 | 2.11 | 1.60   | 1.96 | 43    | 0.93   |          |
| <b>Mean</b> |               | 0.28       | 1.25 | 1.29 | 0.93   | 1.79 | 2.02  | 1744   | 0.50     |
| <b>NCEC</b> | H2O6Bind8     | 4.14       | 0.89 | 0.76 | 9.90   | 3.70 | 3.75  | 8      | 1.75     |

|                     |             |       |      |       |       |       |       |      |      |
|---------------------|-------------|-------|------|-------|-------|-------|-------|------|------|
|                     | HW6C1       | 2.99  | 0.83 | 0.78  | 4.52  | 3.85  | 4.81  | 6    | 1.66 |
|                     | HW6F        | 0.77  | 1.04 | 2.04  | 5.45  | 4.80  | 4.24  | 6    | 2.05 |
|                     | FmH2O10     | 6.20  | 3.62 | 6.20  | 17.56 | 16.30 | 16.10 | 10   | 5.73 |
|                     | Shields38   | 5.86  | 0.67 | 1.30  | 9.45  | 3.21  | 4.09  | 38   | 1.95 |
|                     | SW49Bind345 | 1.39  | 1.23 | 1.02  | 1.71  | 2.35  | 2.58  | 31   | 0.73 |
|                     | SW49Bind6   | 2.79  | 3.12 | 2.45  | 5.01  | 6.09  | 6.53  | 18   | 1.64 |
|                     | WATER27     | 5.15  | 1.58 | 2.16  | 7.79  | 2.87  | 3.22  | 23   | 2.01 |
|                     | 3B-69-TRIM  | 0.71  | 3.94 | 4.17  | 2.24  | 5.84  | 5.95  | 69   | 1.53 |
|                     | CE20        | 3.86  | 1.06 | 1.45  | 5.38  | 2.17  | 2.64  | 20   | 1.39 |
|                     | H2O20Bind10 | 14.32 | 9.60 | 11.56 | 46.41 | 31.28 | 29.51 | 10   | 9.45 |
|                     | H2O20Bind4  | 24.57 | 6.18 | 3.21  | 39.83 | 18.57 | 22.30 | 4    | 8.69 |
|                     | <b>Mean</b> | 3.79  | 2.57 | 2.90  | 7.74  | 5.96  | 6.25  | 243  | 2.18 |
| <b>NCD</b>          | TA13        | 4.66  | 2.01 | 4.14  | 1.44  | 3.21  | 2.05  | 13   | 2.09 |
|                     | XB18        | 1.06  | 0.61 | 0.66  | 0.58  | 0.71  | 1.25  | 8    | 0.56 |
|                     | Bauza30     | 3.21  | 1.77 | 2.62  | 1.73  | 2.02  | 1.32  | 30   | 1.37 |
|                     | CT20        | 0.31  | 0.37 | 0.36  | 0.31  | 0.58  | 0.65  | 20   | 0.28 |
|                     | XB51        | 1.64  | 0.80 | 1.25  | 0.68  | 1.21  | 1.18  | 20   | 0.74 |
|                     | <b>Mean</b> | 2.25  | 1.18 | 1.87  | 1.04  | 1.58  | 1.24  | 91   | 1.02 |
| <b>Overall mean</b> |             | 0.78  | 1.40 | 1.51  | 1.73  | 2.27  | 2.48  | 2078 | 0.72 |

**Supplementary Table S12. MUEs (kcal/mol) of 38 functionals for the 55 datasets of the GMTKN55 database.**

| Database     | Dataset  | DSD-BLYP-D3(BJ) | PWPB95-D3(BJ) | DM21 | B2GPPLYP-D3(BJ) | B2PLYP-D3(BJ) |
|--------------|----------|-----------------|---------------|------|-----------------|---------------|
| <b>Small</b> | W4-11    | 2.51            | 1.86          | 3.04 | 2.77            | 1.98          |
|              | G21EA    | 1.76            | 1.71          | 1.34 | 1.71            | 1.29          |
|              | G21IP    | 2.02            | 1.94          | 1.81 | 2.01            | 2.28          |
|              | DIPCS10  | 3.99            | 4.09          | 2.07 | 3.40            | 3.96          |
|              | PA26     | 1.02            | 1.90          | 1.74 | 1.13            | 1.30          |
|              | SIE4x4   | 5.88            | 10.02         | 4.92 | 6.69            | 10.08         |
|              | ALKBDE10 | 2.78            | 3.13          | 4.22 | 2.91            | 3.17          |
|              | YBDE18   | 0.95            | 1.91          | 2.84 | 0.93            | 2.12          |
|              | AL2X6    | 0.54            | 0.91          | 0.82 | 0.63            | 2.21          |
|              | HEAVYSB1 | 2.10            | 0.73          | 3.42 | 1.91            | 1.70          |
|              | NBPRC    | 0.88            | 0.85          | 1.64 | 0.93            | 1.36          |
|              | ALK8     | 2.71            | 4.23          | 3.42 | 2.60            | 1.07          |
|              | RC21     | 1.84            | 1.32          | 1.02 | 1.39            | 1.16          |
|              | G2RC     | 1.03            | 2.17          | 1.38 | 1.36            | 1.44          |

|              |             |      |      |       |      |       |
|--------------|-------------|------|------|-------|------|-------|
|              | BH76RC      | 0.81 | 1.14 | 1.22  | 0.96 | 1.13  |
|              | FH51        | 1.11 | 1.16 | 1.04  | 1.05 | 1.50  |
|              | TAUT15      | 0.46 | 0.62 | 0.45  | 0.54 | 0.72  |
|              | DC13        | 3.94 | 3.71 | 4.23  | 4.13 | 6.77  |
|              | <b>Mean</b> | 1.98 | 2.07 | 2.24  | 2.08 | 2.16  |
| <b>Large</b> | MB16-43     | 7.92 | 6.71 | 6.65  | 9.44 | 16.62 |
|              | DARC        | 2.38 | 1.72 | 1.04  | 2.58 | 5.03  |
|              | RSE43       | 0.59 | 0.97 | 1.45  | 0.41 | 0.57  |
|              | BSR36       | 1.49 | 2.42 | 0.51  | 2.08 | 2.42  |
|              | CDIE20      | 0.56 | 0.70 | 0.35  | 0.64 | 0.75  |
|              | ISO34       | 0.69 | 0.79 | 0.58  | 0.74 | 1.13  |
|              | ISOL24      | 2.38 | 2.09 | 1.56  | 2.66 | 3.83  |
|              | C60ISO      | 7.63 | 3.48 | 11.35 | 6.04 | 6.76  |
|              | PArel       | 0.53 | 0.68 | 0.84  | 0.55 | 0.74  |
|              | <b>Mean</b> | 2.57 | 2.38 | 2.32  | 2.89 | 4.60  |
| <b>BH</b>    | BH76        | 1.22 | 1.76 | 2.08  | 1.38 | 2.59  |

|                 |             |      |      |      |      |      |
|-----------------|-------------|------|------|------|------|------|
|                 | BHPERI      | 1.88 | 0.80 | 0.77 | 1.47 | 1.67 |
|                 | BHDIV10     | 1.35 | 1.59 | 1.34 | 1.45 | 2.13 |
|                 | INV24       | 0.80 | 0.78 | 0.90 | 0.79 | 0.69 |
|                 | BHROT27     | 0.23 | 0.32 | 0.19 | 0.33 | 0.26 |
|                 | PX13        | 1.58 | 1.25 | 0.90 | 1.68 | 2.74 |
|                 | WCPT18      | 1.04 | 1.10 | 1.57 | 1.15 | 1.71 |
|                 | <b>Mean</b> | 1.13 | 1.21 | 1.33 | 1.18 | 1.81 |
| <b>Inter-NC</b> | RG18        | 0.16 | 0.19 | 0.57 | 0.16 | 0.15 |
|                 | ADIM6       | 0.37 | 0.18 | 0.11 | 0.44 | 0.25 |
|                 | S22         | 0.17 | 0.41 | 0.20 | 0.14 | 0.15 |
|                 | S66         | 0.17 | 0.26 | 0.18 | 0.23 | 0.18 |
|                 | HEAVY28     | 0.19 | 0.17 | 0.17 | 0.20 | 0.17 |
|                 | WATER27     | 0.94 | 3.59 | 1.96 | 1.87 | 2.03 |
|                 | CARBHB12    | 0.42 | 0.22 | 0.51 | 0.51 | 0.56 |
|                 | PNICO23     | 0.21 | 0.14 | 0.17 | 0.23 | 0.19 |
|                 | HAL59       | 0.43 | 0.30 | 0.58 | 0.44 | 0.41 |

|                     |             |      |      |      |      |      |
|---------------------|-------------|------|------|------|------|------|
|                     | AHB21       | 0.26 | 0.31 | 0.24 | 0.42 | 0.25 |
|                     | CHB6        | 1.70 | 1.53 | 1.06 | 1.81 | 1.18 |
|                     | IL16        | 0.56 | 1.25 | 0.49 | 0.53 | 0.61 |
|                     | <b>Mean</b> | 0.36 | 0.63 | 0.49 | 0.48 | 0.45 |
| <b>Intra-NC</b>     | IDISP       | 1.02 | 1.38 | 1.37 | 1.16 | 1.96 |
|                     | ICONF       | 0.18 | 0.18 | 0.18 | 0.20 | 0.20 |
|                     | ACONF       | 0.19 | 0.25 | 0.13 | 0.14 | 0.13 |
|                     | AMINO20x4   | 0.13 | 0.23 | 0.19 | 0.13 | 0.15 |
|                     | PCONF21     | 0.23 | 0.45 | 0.27 | 0.28 | 0.34 |
|                     | MCONF       | 0.30 | 0.34 | 0.22 | 0.21 | 0.23 |
|                     | SCONF       | 0.06 | 0.18 | 0.36 | 0.07 | 0.12 |
|                     | UPU23       | 0.43 | 0.53 | 0.50 | 0.47 | 0.48 |
|                     | BUT14DIOL   | 0.06 | 0.36 | 0.17 | 0.09 | 0.13 |
|                     | <b>Mean</b> | 0.19 | 0.33 | 0.25 | 0.19 | 0.23 |
| <b>Overall mean</b> |             | 1.29 | 1.38 | 1.40 | 1.41 | 1.79 |

| Database | Dataset  | MPW2PLYP-D3(BJ) | CF22D | PpF   | $\omega$ B97M-V | M08-HX | PW6B95-D3(BJ) |
|----------|----------|-----------------|-------|-------|-----------------|--------|---------------|
| Small    | W4-11    | 2.66            | 1.85  | 2.36  | 3.73            | 3.12   | 2.50          |
|          | G21EA    | 1.48            | 1.24  | 3.44  | 2.91            | 1.82   | 1.27          |
|          | G21IP    | 2.34            | 2.77  | 3.40  | 3.41            | 3.37   | 2.77          |
|          | DIPCS10  | 3.49            | 5.73  | 7.62  | 5.25            | 3.37   | 2.74          |
|          | PA26     | 1.19            | 1.27  | 1.24  | 1.37            | 0.99   | 2.52          |
|          | SIE4x4   | 9.22            | 10.95 | 11.34 | 10.88           | 8.62   | 15.36         |
|          | ALKBDE10 | 3.23            | 3.30  | 4.07  | 5.43            | 3.86   | 3.96          |
|          | YBDE18   | 2.10            | 2.55  | 3.40  | 3.19            | 2.18   | 3.26          |
|          | AL2X6    | 2.66            | 1.23  | 0.87  | 1.30            | 2.21   | 0.61          |
|          | HEAVYSB1 | 2.44            | 2.34  | 1.17  | 1.73            | 3.09   | 1.38          |
|          | NBPRC    | 1.71            | 1.27  | 1.13  | 0.90            | 1.96   | 1.46          |
|          | ALK8     | 1.40            | 3.61  | 4.48  | 2.53            | 2.22   | 4.48          |
|          | RC21     | 1.05            | 1.56  | 1.94  | 2.14            | 1.50   | 2.83          |
|          | G2RC     | 1.59            | 2.08  | 2.71  | 1.94            | 3.29   | 3.08          |
|          | BH76RC   | 1.26            | 1.25  | 1.28  | 1.29            | 1.19   | 1.48          |

|              |             |       |       |      |       |       |      |
|--------------|-------------|-------|-------|------|-------|-------|------|
|              | FH51        | 1.18  | 1.11  | 1.53 | 1.04  | 1.24  | 1.67 |
|              | TAUT15      | 0.65  | 0.81  | 0.70 | 0.34  | 0.65  | 0.88 |
|              | DC13        | 6.42  | 4.21  | 5.15 | 5.40  | 7.41  | 6.90 |
|              | <b>Mean</b> | 2.34  | 2.23  | 2.75 | 2.98  | 2.72  | 2.87 |
| <b>Large</b> | MB16-43     | 22.08 | 10.99 | 9.16 | 14.82 | 16.19 | 8.97 |
|              | DARC        | 4.64  | 1.42  | 1.46 | 0.64  | 1.56  | 3.66 |
|              | RSE43       | 0.49  | 0.76  | 0.93 | 1.26  | 0.56  | 2.16 |
|              | BSR36       | 3.76  | 0.18  | 0.77 | 0.81  | 2.78  | 3.20 |
|              | CDIE20      | 0.70  | 0.55  | 0.68 | 0.60  | 0.64  | 1.14 |
|              | ISO34       | 1.08  | 0.61  | 0.88 | 0.62  | 0.94  | 1.28 |
|              | ISOL24      | 3.78  | 1.86  | 2.08 | 1.59  | 2.33  | 3.67 |
|              | C60ISO      | 4.65  | 3.95  | 5.90 | 11.47 | 7.46  | 1.65 |
|              | PArel       | 0.68  | 0.99  | 1.00 | 0.59  | 0.92  | 0.95 |
|              | <b>Mean</b> | 5.63  | 2.73  | 2.67 | 3.77  | 4.23  | 3.43 |
| <b>BH</b>    | BH76        | 2.32  | 1.70  | 2.00 | 1.60  | 0.99  | 4.02 |
|              | BHPERI      | 0.85  | 1.12  | 1.00 | 1.13  | 1.61  | 1.06 |

|                 |             |      |      |      |      |      |      |
|-----------------|-------------|------|------|------|------|------|------|
|                 | BHDIV10     | 1.73 | 1.15 | 1.07 | 1.28 | 1.04 | 2.62 |
|                 | INV24       | 0.71 | 1.69 | 1.39 | 1.30 | 1.92 | 1.15 |
|                 | BHROT27     | 0.32 | 0.24 | 0.48 | 0.22 | 0.42 | 0.56 |
|                 | PX13        | 2.15 | 0.83 | 1.34 | 1.89 | 2.60 | 1.45 |
|                 | WCPT18      | 1.45 | 1.16 | 0.97 | 1.38 | 1.55 | 1.39 |
|                 | <b>Mean</b> | 1.52 | 1.28 | 1.39 | 1.29 | 1.27 | 2.30 |
| <b>Inter-NC</b> | RG18        | 0.27 | 0.14 | 0.19 | 0.08 | 0.43 | 0.22 |
|                 | ADIM6       | 0.10 | 0.04 | 0.10 | 0.11 | 0.59 | 0.32 |
|                 | S22         | 0.31 | 0.51 | 0.54 | 0.24 | 0.43 | 0.32 |
|                 | S66         | 0.29 | 0.23 | 0.18 | 0.12 | 0.27 | 0.19 |
|                 | HEAVY28     | 0.12 | 0.23 | 0.35 | 0.20 | 0.31 | 0.17 |
|                 | WATER27     | 4.99 | 1.70 | 3.42 | 0.76 | 1.29 | 2.19 |
|                 | CARBHB12    | 0.75 | 0.32 | 0.25 | 0.18 | 0.45 | 0.38 |
|                 | PNICO23     | 0.22 | 0.37 | 0.41 | 0.26 | 0.53 | 0.25 |
|                 | HAL59       | 0.34 | 0.37 | 0.43 | 0.28 | 0.52 | 0.34 |
|                 | AHB21       | 0.63 | 0.24 | 0.69 | 0.22 | 0.53 | 0.37 |

|                     |             |      |      |      |      |      |      |
|---------------------|-------------|------|------|------|------|------|------|
|                     | CHB6        | 1.55 | 0.57 | 0.49 | 0.93 | 2.51 | 1.51 |
|                     | IL16        | 0.50 | 0.87 | 0.65 | 0.89 | 1.24 | 1.28 |
|                     | <b>Mean</b> | 0.77 | 0.45 | 0.64 | 0.30 | 0.58 | 0.52 |
| <b>Intra-NC</b>     | IDISP       | 2.78 | 1.70 | 2.69 | 1.71 | 2.98 | 2.90 |
|                     | ICONF       | 0.25 | 0.28 | 0.26 | 0.17 | 0.51 | 0.23 |
|                     | ACONF       | 0.08 | 0.04 | 0.21 | 0.13 | 0.37 | 0.13 |
|                     | AMINO20x4   | 0.14 | 0.28 | 0.28 | 0.19 | 0.39 | 0.32 |
|                     | PCONF21     | 0.39 | 0.28 | 0.57 | 0.60 | 0.86 | 0.51 |
|                     | MCONF       | 0.10 | 0.19 | 0.43 | 0.38 | 0.54 | 0.37 |
|                     | SCONF       | 0.12 | 0.16 | 0.62 | 0.15 | 0.32 | 0.19 |
|                     | UPU23       | 0.50 | 0.44 | 0.42 | 0.50 | 0.80 | 0.58 |
|                     | BUT14DIOL   | 0.15 | 0.21 | 0.15 | 0.05 | 0.20 | 0.34 |
|                     | <b>Mean</b> | 0.24 | 0.27 | 0.37 | 0.27 | 0.49 | 0.40 |
| <b>Overall mean</b> |             | 2.04 | 1.45 | 1.68 | 1.82 | 1.91 | 1.93 |

| Database     | Dataset   | M06-2X | M06-2X-D3(0) | MN15  | MN15-D3(BJ) | M11-D3(BJ) | M11  | M05-2X |
|--------------|-----------|--------|--------------|-------|-------------|------------|------|--------|
| <b>Small</b> | W4-11     | 3.16   | 3.16         | 2.72  | 2.72        | 3.42       | 3.44 | 4.05   |
|              | G21EA     | 1.76   | 1.76         | 1.37  | 1.37        | 1.56       | 1.56 | 1.80   |
|              | G21IP     | 2.64   | 2.64         | 2.75  | 2.75        | 3.61       | 3.60 | 3.32   |
|              | DIPCS10   | 3.16   | 3.16         | 4.35  | 4.35        | 3.26       | 3.27 | 4.14   |
|              | PA26      | 1.24   | 1.23         | 1.64  | 1.64        | 1.23       | 1.22 | 1.13   |
|              | SIE4x4    | 8.65   | 8.67         | 11.30 | 11.30       | 9.59       | 9.56 | 8.66   |
|              | ALKBDE10  | 4.79   | 4.79         | 2.88  | 2.88        | 4.30       | 4.32 | 4.51   |
|              | YBDE18    | 2.48   | 2.40         | 3.38  | 3.37        | 1.56       | 1.76 | 0.99   |
|              | AL2X6     | 0.88   | 0.90         | 1.45  | 1.47        | 2.39       | 1.31 | 0.72   |
|              | HEAVYSB11 | 8.30   | 8.16         | 5.09  | 5.07        | 1.96       | 1.98 | 3.48   |
|              | NBPRC     | 0.96   | 0.95         | 1.78  | 1.78        | 2.76       | 3.03 | 1.63   |
|              | ALK8      | 2.27   | 2.31         | 3.72  | 3.72        | 3.74       | 3.41 | 2.17   |
|              | RC21      | 1.60   | 1.63         | 1.74  | 1.74        | 2.06       | 2.07 | 2.61   |
|              | G2RC      | 1.92   | 1.92         | 2.63  | 2.63        | 2.81       | 2.89 | 4.00   |
|              | BH76RC    | 1.18   | 1.18         | 1.57  | 1.57        | 1.44       | 1.44 | 1.37   |

|              |             |       |       |       |       |       |       |       |
|--------------|-------------|-------|-------|-------|-------|-------|-------|-------|
|              | FH51        | 1.18  | 1.20  | 1.61  | 1.61  | 1.47  | 1.50  | 1.70  |
|              | TAUT15      | 0.77  | 0.78  | 1.19  | 1.19  | 1.09  | 1.09  | 1.18  |
|              | DC13        | 7.54  | 7.51  | 5.10  | 5.09  | 9.11  | 9.65  | 8.49  |
|              | <b>Mean</b> | 2.73  | 2.72  | 2.75  | 2.75  | 2.96  | 2.99  | 3.16  |
| <b>Large</b> | MB16-43     | 15.18 | 15.68 | 20.19 | 20.23 | 18.01 | 21.28 | 24.96 |
|              | DARC        | 2.33  | 2.16  | 1.71  | 1.70  | 2.60  | 3.22  | 1.30  |
|              | RSE43       | 0.63  | 0.63  | 1.35  | 1.35  | 1.41  | 1.42  | 0.83  |
|              | BSR36       | 2.96  | 2.48  | 0.57  | 0.57  | 1.05  | 1.87  | 2.04  |
|              | CDIE20      | 0.54  | 0.54  | 0.64  | 0.64  | 0.78  | 0.78  | 0.34  |
|              | ISO34       | 1.23  | 1.23  | 1.50  | 1.50  | 1.32  | 1.31  | 1.06  |
|              | ISOL24      | 2.92  | 2.74  | 2.64  | 2.63  | 3.40  | 3.36  | 2.73  |
|              | C60ISO      | 6.75  | 6.88  | 1.95  | 1.96  | 14.75 | 14.60 | 9.71  |
|              | PArel       | 0.97  | 0.97  | 1.34  | 1.34  | 0.77  | 0.78  | 1.02  |
|              | <b>Mean</b> | 4.21  | 4.20  | 4.70  | 4.71  | 4.94  | 5.66  | 5.83  |
| <b>BH</b>    | BH76        | 2.33  | 2.34  | 1.50  | 1.50  | 1.28  | 1.26  | 1.64  |
|              | BHPERI      | 1.36  | 1.35  | 1.26  | 1.26  | 1.89  | 2.16  | 1.33  |

|                 |             |      |      |      |      |      |      |      |
|-----------------|-------------|------|------|------|------|------|------|------|
|                 | BHDIV10     | 1.05 | 1.05 | 1.70 | 1.70 | 1.42 | 1.45 | 1.53 |
|                 | INV24       | 1.29 | 1.28 | 2.68 | 2.68 | 2.49 | 2.55 | 1.60 |
|                 | BHROT27     | 0.36 | 0.36 | 0.48 | 0.48 | 0.66 | 0.66 | 0.47 |
|                 | PX13        | 5.35 | 5.32 | 2.03 | 2.03 | 3.47 | 3.46 | 7.47 |
|                 | WCPT18      | 1.86 | 1.88 | 1.50 | 1.50 | 1.76 | 1.69 | 2.46 |
|                 | <b>Mean</b> | 1.89 | 1.89 | 1.52 | 1.52 | 1.62 | 1.65 | 1.89 |
| <b>Inter-NC</b> | RG18        | 0.23 | 0.32 | 0.10 | 0.10 | 0.31 | 0.43 | 0.14 |
|                 | ADIM6       | 0.44 | 0.27 | 1.27 | 1.32 | 0.58 | 0.32 | 0.92 |
|                 | S22         | 0.39 | 0.34 | 0.56 | 0.56 | 0.41 | 0.65 | 0.79 |
|                 | S66         | 0.26 | 0.22 | 0.43 | 0.44 | 0.28 | 0.46 | 0.57 |
|                 | HEAVY28     | 0.35 | 0.33 | 0.33 | 0.34 | 0.27 | 0.61 | 0.35 |
|                 | WATER27     | 2.83 | 3.70 | 1.22 | 1.23 | 1.34 | 1.85 | 3.54 |
|                 | CARBHB12    | 0.23 | 0.25 | 0.24 | 0.24 | 0.22 | 0.36 | 0.26 |
|                 | PNICO23     | 0.28 | 0.29 | 0.30 | 0.30 | 0.32 | 0.58 | 0.35 |
|                 | HAL59       | 0.40 | 0.35 | 0.54 | 0.54 | 0.65 | 1.01 | 0.62 |
|                 | AHB21       | 0.94 | 0.95 | 0.33 | 0.33 | 0.46 | 0.48 | 1.11 |

|                     |             |      |      |      |      |      |      |      |
|---------------------|-------------|------|------|------|------|------|------|------|
|                     | CHB6        | 1.42 | 1.42 | 0.32 | 0.32 | 2.75 | 2.45 | 1.96 |
|                     | IL16        | 0.62 | 0.47 | 1.03 | 1.02 | 1.53 | 1.93 | 1.45 |
|                     | <b>Mean</b> | 0.62 | 0.67 | 0.52 | 0.53 | 0.59 | 0.84 | 0.90 |
| <b>Intra-NC</b>     | IDISP       | 1.92 | 2.07 | 3.58 | 3.60 | 3.65 | 3.34 | 2.01 |
|                     | ICONF       | 0.32 | 0.32 | 0.51 | 0.51 | 0.53 | 0.49 | 0.27 |
|                     | ACONF       | 0.25 | 0.27 | 0.50 | 0.50 | 0.72 | 0.66 | 0.12 |
|                     | AMINO20x4   | 0.30 | 0.30 | 0.52 | 0.52 | 0.51 | 0.49 | 0.29 |
|                     | PCONF21     | 0.88 | 1.09 | 1.09 | 1.10 | 1.34 | 0.98 | 0.49 |
|                     | MCONF       | 0.34 | 0.55 | 0.57 | 0.57 | 1.24 | 0.84 | 0.17 |
|                     | SCONF       | 0.25 | 0.26 | 0.50 | 0.50 | 0.80 | 0.78 | 0.22 |
|                     | UPU23       | 0.61 | 0.50 | 0.54 | 0.53 | 0.69 | 0.84 | 0.90 |
|                     | BUT14DIOL   | 0.13 | 0.13 | 0.36 | 0.36 | 0.26 | 0.25 | 0.23 |
|                     | <b>Mean</b> | 0.36 | 0.40 | 0.59 | 0.59 | 0.74 | 0.64 | 0.34 |
| <b>Overall mean</b> |             | 1.97 | 1.99 | 2.04 | 2.04 | 2.20 | 2.36 | 2.43 |

| Database | Dataset   | M05-2X-D3(0) | $\omega$ B97X-D | $\omega$ B97X-V | M11plus | M06-D3(0) | PBE0-D3(BJ) | M06   |
|----------|-----------|--------------|-----------------|-----------------|---------|-----------|-------------|-------|
| Small    | W4-11     | 4.04         | 2.35            | 2.78            | 3.51    | 3.15      | 3.70        | 3.15  |
|          | G21EA     | 1.80         | 1.57            | 1.84            | 1.98    | 2.18      | 2.62        | 2.18  |
|          | G21IP     | 3.32         | 2.95            | 2.96            | 3.62    | 3.09      | 3.68        | 3.09  |
|          | DIPCS10   | 4.14         | 5.42            | 4.10            | 4.21    | 6.51      | 2.99        | 6.50  |
|          | PA26      | 1.13         | 4.20            | 2.65            | 2.12    | 2.90      | 2.88        | 2.85  |
|          | SIE4x4    | 8.71         | 13.37           | 11.49           | 7.20    | 14.32     | 14.39       | 14.24 |
|          | ALKBDE10  | 4.51         | 3.86            | 4.07            | 2.93    | 3.44      | 5.66        | 3.44  |
|          | YBDE18    | 0.93         | 2.81            | 2.03            | 1.96    | 4.54      | 0.98        | 4.83  |
|          | AL2X6     | 0.77         | 3.08            | 1.21            | 0.52    | 2.46      | 1.48        | 3.07  |
|          | HEAVYSB11 | 3.20         | 2.17            | 1.39            | 0.78    | 1.78      | 1.37        | 1.83  |
|          | NBPRC     | 1.53         | 1.76            | 1.43            | 1.66    | 2.82      | 3.18        | 3.11  |
|          | ALK8      | 2.18         | 3.12            | 0.95            | 3.65    | 3.37      | 4.61        | 3.46  |
|          | RC21      | 2.71         | 2.95            | 3.53            | 2.00    | 1.69      | 5.50        | 1.64  |
|          | G2RC      | 4.02         | 3.71            | 3.92            | 4.50    | 3.79      | 6.75        | 3.81  |
|          | BH76RC    | 1.37         | 1.98            | 1.81            | 1.68    | 1.65      | 2.46        | 1.65  |

|              |             |       |       |       |       |       |       |       |
|--------------|-------------|-------|-------|-------|-------|-------|-------|-------|
|              | FH51        | 1.76  | 1.85  | 2.30  | 2.35  | 1.85  | 2.77  | 1.84  |
|              | TAUT15      | 1.17  | 0.79  | 0.72  | 2.14  | 0.78  | 1.13  | 0.80  |
|              | DC13        | 8.40  | 5.48  | 6.52  | 6.36  | 6.51  | 8.01  | 6.65  |
|              | <b>Mean</b> | 3.16  | 3.00  | 2.96  | 3.06  | 3.29  | 3.90  | 3.32  |
| <b>Large</b> | MB16-43     | 26.32 | 31.11 | 32.51 | 32.60 | 32.43 | 15.86 | 34.42 |
|              | DARC        | 0.96  | 1.61  | 4.31  | 1.42  | 3.83  | 3.76  | 4.65  |
|              | RSE43       | 0.81  | 1.40  | 0.98  | 0.34  | 1.54  | 1.45  | 1.58  |
|              | BSR36       | 1.04  | 3.79  | 2.11  | 0.49  | 1.29  | 3.25  | 2.52  |
|              | CDIE20      | 0.34  | 0.57  | 0.63  | 0.78  | 1.03  | 1.24  | 1.04  |
|              | ISO34       | 1.05  | 0.90  | 1.17  | 1.27  | 1.43  | 1.42  | 1.40  |
|              | ISOL24      | 2.54  | 1.97  | 2.98  | 2.47  | 3.52  | 2.11  | 4.01  |
|              | C60ISO      | 9.78  | 8.50  | 13.74 | 13.12 | 2.10  | 2.35  | 2.11  |
|              | PArel       | 1.02  | 0.66  | 0.63  | 0.76  | 1.08  | 1.21  | 1.08  |
|              | <b>Mean</b> | 5.88  | 7.14  | 7.56  | 7.02  | 7.22  | 4.46  | 7.86  |
| <b>BH</b>    | BH76        | 1.66  | 1.56  | 1.83  | 1.31  | 2.61  | 5.00  | 2.56  |
|              | BHPERI      | 1.47  | 2.16  | 2.07  | 2.50  | 1.90  | 3.27  | 2.24  |

|                 |             |      |      |      |      |      |      |      |
|-----------------|-------------|------|------|------|------|------|------|------|
|                 | BHDIV10     | 1.51 | 1.22 | 0.85 | 1.84 | 1.94 | 4.81 | 1.94 |
|                 | INV24       | 1.60 | 1.79 | 1.22 | 2.41 | 1.54 | 1.17 | 1.62 |
|                 | BHROT27     | 0.46 | 0.39 | 0.31 | 0.29 | 0.67 | 0.58 | 0.69 |
|                 | PX13        | 7.43 | 1.51 | 2.56 | 4.98 | 1.45 | 6.55 | 1.47 |
|                 | WCPT18      | 2.52 | 1.23 | 1.71 | 2.45 | 2.01 | 4.33 | 1.95 |
|                 | <b>Mean</b> | 1.92 | 1.45 | 1.56 | 1.84 | 1.94 | 3.71 | 1.98 |
| <b>Inter-NC</b> | RG18        | 0.16 | 0.29 | 0.10 | 0.14 | 0.32 | 0.11 | 0.36 |
|                 | ADIM6       | 0.36 | 1.03 | 0.16 | 0.38 | 1.82 | 0.06 | 0.23 |
|                 | S22         | 0.35 | 0.21 | 0.22 | 0.54 | 0.27 | 0.48 | 1.03 |
|                 | S66         | 0.31 | 0.34 | 0.12 | 0.31 | 0.44 | 0.36 | 0.68 |
|                 | HEAVY28     | 0.30 | 0.25 | 0.18 | 0.28 | 0.31 | 0.31 | 0.35 |
|                 | WATER27     | 5.42 | 1.31 | 1.30 | 5.67 | 1.52 | 5.92 | 2.59 |
|                 | CARBHB12    | 0.24 | 0.52 | 0.33 | 0.62 | 0.31 | 1.44 | 0.31 |
|                 | PNICO23     | 0.40 | 0.28 | 0.19 | 0.45 | 0.25 | 0.94 | 0.23 |
|                 | HAL59       | 0.46 | 0.56 | 0.30 | 0.41 | 0.47 | 0.61 | 0.57 |
|                 | AHB21       | 1.14 | 0.30 | 0.34 | 1.04 | 0.31 | 1.24 | 0.32 |

|                     |             |      |      |      |      |      |      |      |
|---------------------|-------------|------|------|------|------|------|------|------|
|                     | CHB6        | 1.95 | 0.50 | 0.87 | 1.69 | 1.28 | 1.37 | 1.26 |
|                     | IL16        | 1.04 | 1.53 | 1.02 | 1.02 | 0.41 | 0.34 | 0.73 |
|                     | <b>Mean</b> | 0.92 | 0.53 | 0.36 | 0.95 | 0.52 | 1.05 | 0.74 |
| <b>Intra-NC</b>     | IDISP       | 1.37 | 2.63 | 2.59 | 1.83 | 4.08 | 1.54 | 3.76 |
|                     | ICONF       | 0.27 | 0.46 | 0.26 | 0.44 | 0.36 | 0.28 | 0.35 |
|                     | ACONF       | 0.07 | 0.23 | 0.03 | 0.22 | 0.52 | 0.06 | 0.35 |
|                     | AMINO20x4   | 0.28 | 0.32 | 0.19 | 0.38 | 0.41 | 0.28 | 0.36 |
|                     | PCONF21     | 0.36 | 0.50 | 0.30 | 0.82 | 1.19 | 0.90 | 0.41 |
|                     | MCONF       | 0.51 | 0.31 | 0.24 | 0.16 | 0.71 | 0.27 | 0.33 |
|                     | SCONF       | 0.27 | 0.31 | 0.15 | 0.33 | 0.32 | 0.27 | 0.31 |
|                     | UPU23       | 0.48 | 0.72 | 0.59 | 0.78 | 0.83 | 0.54 | 0.53 |
|                     | BUT14DIOL   | 0.19 | 0.17 | 0.04 | 0.12 | 0.25 | 0.22 | 0.18 |
|                     | <b>Mean</b> | 0.33 | 0.38 | 0.25 | 0.37 | 0.58 | 0.34 | 0.40 |
| <b>Overall mean</b> |             | 2.44 | 2.46 | 2.47 | 2.60 | 2.67 | 2.70 | 2.79 |

| Database     | Dataset   | r2SCAN-3c | B3LYP-D3(BJ) | PBE0  | MN15-L | r2SCAN | SCAN- | TPSS-D3(BJ) |
|--------------|-----------|-----------|--------------|-------|--------|--------|-------|-------------|
| <b>Small</b> | W4-11     | 3.79      | 3.40         | 3.62  | 3.41   | 3.85   | 4.02  | 5.91        |
|              | G21EA     | 4.83      | 1.91         | 2.62  | 2.40   | 5.12   | 3.64  | 2.20        |
|              | G21IP     | 4.65      | 3.55         | 3.68  | 3.46   | 4.66   | 4.69  | 3.95        |
|              | DIPCS10   | 5.08      | 4.73         | 2.99  | 10.46  | 5.09   | 4.93  | 3.69        |
|              | PA26      | 1.96      | 2.87         | 2.56  | 2.25   | 2.54   | 3.14  | 4.87        |
|              | SIE4x4    | 17.80     | 18.06        | 14.15 | 10.99  | 18.07  | 17.99 | 21.91       |
|              | ALKBDE10  | 5.13      | 4.39         | 5.83  | 4.48   | 5.12   | 19.21 | 4.16        |
|              | YBDE18    | 3.65      | 4.72         | 2.55  | 4.20   | 3.84   | 3.36  | 4.67        |
|              | AL2X6     | 1.58      | 2.71         | 2.76  | 1.35   | 0.96   | 1.95  | 2.24        |
|              | HEAVYSB11 | 3.47      | 3.30         | 3.58  | 6.47   | 3.93   | 6.79  | 2.57        |
|              | NBPRC     | 2.05      | 2.00         | 2.55  | 1.93   | 1.60   | 2.28  | 1.46        |
|              | ALK8      | 3.22      | 2.48         | 1.87  | 3.23   | 2.70   | 3.12  | 3.73        |
|              | RC21      | 5.36      | 2.44         | 4.22  | 2.00   | 4.64   | 6.53  | 4.44        |
|              | G2RC      | 5.70      | 2.73         | 6.21  | 6.73   | 5.50   | 6.29  | 7.11        |
|              | BH76RC    | 3.18      | 2.25         | 2.37  | 2.43   | 3.14   | 3.38  | 3.57        |

|              |             |       |       |       |       |       |       |       |
|--------------|-------------|-------|-------|-------|-------|-------|-------|-------|
|              | FH51        | 2.74  | 2.61  | 2.47  | 2.55  | 2.49  | 2.69  | 4.30  |
|              | TAUT15      | 1.28  | 1.16  | 1.15  | 0.70  | 1.57  | 1.72  | 1.63  |
|              | DC13        | 9.32  | 10.57 | 8.87  | 7.83  | 8.60  | 7.30  | 8.91  |
|              | <b>Mean</b> | 4.34  | 3.73  | 3.82  | 3.75  | 4.32  | 4.83  | 5.27  |
| <b>Large</b> | MB16-43     | 14.75 | 24.84 | 17.55 | 20.42 | 13.25 | 16.56 | 25.88 |
|              | DARC        | 2.52  | 8.03  | 3.10  | 2.78  | 3.68  | 2.13  | 5.42  |
|              | RSE43       | 1.40  | 1.72  | 1.59  | 1.23  | 1.54  | 1.29  | 1.97  |
|              | BSR36       | 0.79  | 3.35  | 7.59  | 3.55  | 2.23  | 1.48  | 4.32  |
|              | CDIE20      | 1.35  | 1.00  | 1.38  | 1.78  | 1.64  | 1.48  | 1.67  |
|              | ISO34       | 1.50  | 1.78  | 1.64  | 1.88  | 1.37  | 1.30  | 2.31  |
|              | ISOL24      | 3.40  | 5.80  | 3.96  | 3.54  | 4.88  | 3.34  | 5.84  |
|              | C60ISO      | 4.85  | 2.22  | 2.16  | 5.94  | 5.39  | 6.05  | 8.40  |
|              | PArel       | 1.59  | 1.18  | 1.22  | 2.19  | 1.55  | 1.48  | 1.54  |
|              | <b>Mean</b> | 4.09  | 6.74  | 5.60  | 5.68  | 4.30  | 4.48  | 7.36  |
| <b>BH</b>    | BH76        | 6.06  | 5.70  | 4.62  | 1.81  | 7.16  | 7.71  | 9.22  |
|              | BHPERI      | 4.18  | 1.18  | 1.30  | 1.78  | 3.87  | 5.17  | 5.51  |

|                 |             |      |      |      |       |      |       |      |
|-----------------|-------------|------|------|------|-------|------|-------|------|
|                 | BHDIV10     | 5.38 | 3.22 | 4.27 | 2.08  | 5.98 | 6.51  | 6.90 |
|                 | INV24       | 1.21 | 1.05 | 1.54 | 2.02  | 1.21 | 1.16  | 1.79 |
|                 | BHROT27     | 0.85 | 0.41 | 0.59 | 0.87  | 0.76 | 0.82  | 0.53 |
|                 | PX13        | 5.29 | 4.33 | 6.18 | 6.38  | 8.86 | 8.23  | 8.92 |
|                 | WCPT18      | 3.94 | 2.27 | 3.72 | 1.81  | 5.94 | 6.12  | 6.34 |
|                 | <b>Mean</b> | 4.20 | 3.24 | 3.24 | 2.02  | 5.03 | 5.43  | 6.19 |
| <b>Inter-NC</b> | RG18        | 0.19 | 0.13 | 0.34 | 0.17  | 0.23 | 0.24  | 0.13 |
|                 | ADIM6       | 0.50 | 0.11 | 3.44 | 3.88  | 1.97 | 0.05  | 0.16 |
|                 | S22         | 0.40 | 0.31 | 2.37 | 1.82  | 1.16 | 0.44  | 0.32 |
|                 | S66         | 0.29 | 0.26 | 2.03 | 1.66  | 1.01 | 0.45  | 0.29 |
|                 | HEAVY28     | 0.28 | 0.34 | 0.58 | 0.58  | 0.49 | 0.32  | 0.35 |
|                 | WATER27     | 2.77 | 4.07 | 2.21 | 12.01 | 7.72 | 10.65 | 4.43 |
|                 | CARBHB12    | 1.04 | 0.88 | 0.72 | 1.20  | 0.92 | 1.35  | 1.42 |
|                 | PNICO23     | 0.71 | 0.48 | 0.65 | 0.40  | 0.66 | 0.98  | 1.11 |
|                 | HAL59       | 0.73 | 0.57 | 1.09 | 0.59  | 0.99 | 0.99  | 0.99 |
|                 | AHB21       | 1.11 | 0.33 | 0.94 | 2.29  | 2.48 | 1.61  | 0.67 |

|                     |             |      |      |      |      |      |      |      |
|---------------------|-------------|------|------|------|------|------|------|------|
|                     | CHB6        | 0.42 | 1.41 | 1.08 | 0.64 | 0.42 | 0.44 | 0.94 |
|                     | IL16        | 0.56 | 0.76 | 1.73 | 2.40 | 1.04 | 0.91 | 0.34 |
|                     | <b>Mean</b> | 0.74 | 0.75 | 1.42 | 2.19 | 1.60 | 1.61 | 0.94 |
| <b>Intra-NC</b>     | IDISP       | 3.27 | 3.57 | 9.51 | 7.55 | 6.03 | 2.45 | 3.22 |
|                     | ICONF       | 1.39 | 0.29 | 0.40 | 0.53 | 0.33 | 0.31 | 0.19 |
|                     | ACONF       | 0.33 | 0.05 | 0.63 | 0.69 | 0.41 | 0.15 | 0.09 |
|                     | AMINO20x4   | 0.26 | 0.21 | 0.48 | 0.92 | 0.26 | 0.22 | 0.34 |
|                     | PCONF21     | 0.66 | 0.53 | 3.06 | 4.10 | 1.02 | 0.49 | 1.08 |
|                     | MCONF       | 0.39 | 0.22 | 1.65 | 1.61 | 0.63 | 0.47 | 0.42 |
|                     | SCONF       | 0.42 | 0.30 | 0.28 | 0.92 | 0.39 | 0.60 | 1.05 |
|                     | UPU23       | 0.46 | 0.61 | 1.90 | 1.68 | 0.97 | 0.44 | 0.49 |
|                     | BUT14DIOL   | 0.39 | 0.31 | 0.23 | 1.10 | 0.16 | 0.41 | 0.28 |
|                     | <b>Mean</b> | 0.49 | 0.36 | 1.08 | 1.44 | 0.54 | 0.41 | 0.48 |
| <b>Overall mean</b> |             | 2.81 | 2.90 | 3.02 | 3.08 | 3.13 | 3.35 | 3.92 |

| Database | Dataset   | M06-L-D3(0) | M06-L | PBE-D3(BJ) | B3LYP | TPSS  | PBE   | Number | Mean  |
|----------|-----------|-------------|-------|------------|-------|-------|-------|--------|-------|
| Small    | W4-11     | 4.46        | 4.46  | 15.68      | 4.22  | 5.11  | 14.96 | 140    | 3.97  |
|          | G21EA     | 3.80        | 3.80  | 3.43       | 1.91  | 2.21  | 3.43  | 25     | 2.13  |
|          | G21IP     | 4.46        | 4.46  | 3.85       | 3.55  | 3.95  | 3.85  | 36     | 3.21  |
|          | DIPCS10   | 8.42        | 8.42  | 4.50       | 4.75  | 3.69  | 4.51  | 10     | 4.62  |
|          | PA26      | 5.11        | 5.09  | 2.19       | 2.28  | 4.38  | 1.97  | 26     | 2.23  |
|          | SIE4x4    | 17.96       | 17.94 | 23.72      | 17.63 | 21.56 | 23.44 | 16     | 12.80 |
|          | ALKBDE10  | 5.59        | 5.59  | 6.30       | 4.57  | 4.26  | 6.21  | 10     | 4.64  |
|          | YBDE18    | 4.82        | 4.90  | 4.93       | 8.47  | 7.29  | 5.91  | 18     | 3.20  |
|          | AL2X6     | 0.62        | 0.80  | 1.63       | 9.05  | 3.96  | 4.26  | 6      | 1.86  |
|          | HEAVYSB11 | 2.56        | 2.71  | 3.55       | 7.91  | 4.44  | 4.58  | 11     | 3.25  |
|          | NBPRC     | 3.97        | 4.04  | 2.41       | 5.19  | 2.78  | 2.82  | 12     | 2.05  |
|          | ALK8      | 3.70        | 3.76  | 4.14       | 6.07  | 1.61  | 2.78  | 8      | 3.11  |
|          | RC21      | 3.11        | 3.04  | 6.85       | 2.30  | 3.14  | 5.48  | 21     | 2.63  |
|          | G2RC      | 5.90        | 5.89  | 6.92       | 2.56  | 6.57  | 6.29  | 25     | 3.74  |
|          | BH76RC    | 2.92        | 2.92  | 4.18       | 2.38  | 3.63  | 4.09  | 30     | 1.93  |

|              |             |       |       |       |       |       |       |     |       |
|--------------|-------------|-------|-------|-------|-------|-------|-------|-----|-------|
|              | FH51        | 2.64  | 2.67  | 3.17  | 3.97  | 5.09  | 3.40  | 51  | 2.06  |
|              | TAUT15      | 1.44  | 1.45  | 1.84  | 1.13  | 1.61  | 1.81  | 15  | 1.04  |
|              | DC13        | 10.41 | 10.47 | 8.63  | 15.14 | 12.56 | 10.14 | 13  | 7.49  |
|              | <b>Mean</b> | 4.71  | 4.72  | 8.26  | 4.66  | 5.26  | 8.07  | 473 | 3.51  |
| <b>Large</b> | MB16-43     | 63.27 | 63.92 | 24.26 | 57.89 | 47.14 | 22.78 | 43  | 23.75 |
|              | DARC        | 8.07  | 8.30  | 3.31  | 15.75 | 11.39 | 6.94  | 14  | 3.80  |
|              | RSE43       | 2.67  | 2.68  | 2.94  | 1.96  | 2.17  | 3.10  | 43  | 1.37  |
|              | BSR36       | 5.09  | 5.64  | 3.17  | 10.70 | 10.21 | 7.67  | 36  | 3.03  |
|              | CDIE20      | 2.22  | 2.22  | 1.65  | 1.26  | 1.86  | 1.81  | 20  | 0.99  |
|              | ISO34       | 2.32  | 2.31  | 1.49  | 2.31  | 2.64  | 1.80  | 34  | 1.36  |
|              | ISOL24      | 6.52  | 6.71  | 4.39  | 9.53  | 8.87  | 6.83  | 24  | 3.70  |
|              | C60ISO      | 7.07  | 7.20  | 10.72 | 2.01  | 8.80  | 11.06 | 9   | 6.95  |
|              | PArel       | 1.62  | 1.63  | 1.81  | 1.17  | 1.54  | 1.81  | 20  | 1.09  |
|              | <b>Mean</b> | 14.43 | 14.67 | 6.80  | 14.62 | 12.75 | 7.75  | 243 | 6.10  |
| <b>BH</b>    | BH76        | 3.93  | 3.92  | 9.62  | 4.94  | 8.63  | 9.15  | 76  | 3.31  |
|              | BHPERI      | 1.86  | 1.91  | 6.69  | 4.42  | 2.26  | 3.95  | 26  | 2.10  |

|                 |             |      |      |       |      |      |       |     |      |
|-----------------|-------------|------|------|-------|------|------|-------|-----|------|
|                 | BHDIV10     | 3.08 | 3.09 | 8.87  | 2.76 | 6.09 | 8.23  | 10  | 2.66 |
|                 | INV24       | 1.46 | 1.47 | 2.07  | 1.87 | 2.72 | 2.67  | 24  | 1.61 |
|                 | BHROT27     | 0.98 | 0.98 | 0.47  | 0.40 | 0.54 | 0.47  | 27  | 0.49 |
|                 | PX13        | 0.94 | 0.92 | 12.02 | 3.54 | 8.35 | 11.54 | 13  | 4.02 |
|                 | WCPT18      | 2.10 | 2.09 | 9.34  | 1.11 | 5.45 | 8.61  | 18  | 2.56 |
|                 | <b>Mean</b> | 2.52 | 2.52 | 7.12  | 3.30 | 5.47 | 6.51  | 194 | 2.49 |
| <b>Inter-NC</b> | RG18        | 0.32 | 0.32 | 0.26  | 0.80 | 0.48 | 0.28  | 18  | 0.25 |
|                 | ADIM6       | 0.94 | 0.17 | 0.21  | 5.06 | 4.70 | 3.38  | 6   | 0.94 |
|                 | S22         | 0.44 | 0.81 | 0.48  | 3.78 | 3.44 | 2.55  | 22  | 0.75 |
|                 | S66         | 0.35 | 0.59 | 0.40  | 3.24 | 2.99 | 2.11  | 66  | 0.61 |
|                 | HEAVY28     | 0.53 | 0.56 | 0.42  | 1.30 | 0.86 | 0.47  | 28  | 0.37 |
|                 | WATER27     | 1.11 | 1.95 | 8.92  | 5.79 | 4.65 | 2.83  | 27  | 3.41 |
|                 | CARBHB12    | 0.44 | 0.46 | 1.91  | 0.62 | 0.63 | 1.09  | 12  | 0.58 |
|                 | PNICO23     | 0.33 | 0.40 | 1.32  | 1.78 | 0.94 | 0.82  | 23  | 0.48 |
|                 | HAL59       | 0.49 | 0.56 | 1.18  | 1.78 | 1.55 | 1.30  | 59  | 0.64 |
|                 | AHB21       | 0.49 | 0.49 | 1.15  | 0.86 | 0.71 | 0.83  | 21  | 0.66 |

|                     |             |      |      |      |       |       |       |      |      |
|---------------------|-------------|------|------|------|-------|-------|-------|------|------|
|                     | CHB6        | 1.90 | 1.90 | 0.93 | 1.21  | 1.02  | 0.79  | 6    | 1.30 |
|                     | IL16        | 0.75 | 0.62 | 0.59 | 4.02  | 2.92  | 1.49  | 16   | 1.10 |
|                     | <b>Mean</b> | 0.54 | 0.69 | 1.51 | 2.56  | 2.13  | 1.53  | 304  | 0.87 |
| <b>Intra-NC</b>     | IDISP       | 6.33 | 6.37 | 2.76 | 16.42 | 12.85 | 10.78 | 6    | 3.93 |
|                     | ICONF       | 0.30 | 0.30 | 0.32 | 0.58  | 0.37  | 0.43  | 17   | 0.33 |
|                     | ACONF       | 0.50 | 0.46 | 0.07 | 0.96  | 0.75  | 0.61  | 15   | 0.31 |
|                     | AMINO20x4   | 0.35 | 0.35 | 0.34 | 0.66  | 0.53  | 0.51  | 80   | 0.35 |
|                     | PCONF21     | 1.28 | 1.02 | 1.25 | 3.81  | 3.99  | 3.48  | 18   | 1.12 |
|                     | MCONF       | 0.90 | 0.81 | 0.49 | 2.49  | 2.23  | 1.80  | 51   | 0.64 |
|                     | SCONF       | 0.42 | 0.41 | 0.80 | 0.73  | 0.42  | 0.35  | 17   | 0.39 |
|                     | UPU23       | 0.73 | 0.50 | 0.53 | 2.49  | 2.36  | 1.99  | 23   | 0.79 |
|                     | BUT14DIOL   | 0.22 | 0.21 | 0.46 | 0.38  | 0.30  | 0.26  | 64   | 0.25 |
|                     | <b>Mean</b> | 0.64 | 0.58 | 0.53 | 1.60  | 1.39  | 1.18  | 291  | 0.53 |
| <b>Overall mean</b> |             | 4.37 | 4.43 | 5.02 | 5.08  | 5.11  | 5.16  | 1505 | 2.69 |

## References

- 1 L. Goerigk and S. Grimme, A general database for main group thermochemistry, kinetics, and noncovalent interactions— assessment of common and reparameterized (meta-) GGA density functionals, *J. Chem. Theory Comput.*, 2010, **6**, 107-126.
- 2 A. Karton and L. Goerigk, Accurate reaction barrier heights of pericyclic reactions: Surprisingly large deviations for the CBS-QB3 composite method and their consequences in DFT benchmark studies, *J. Comput. Chem.*, 2015, **36**, 622-632.
- 3 L.-J. Yu, F. Sarrami, R. J. O'Reilly and A. Karton, Can DFT and ab initio methods describe all aspects of the potential energy surface of cycloreversion reactions?, *Mol. Phys.*, 2016, **114**, 21-33.
- 4 L.-J. Yu, F. Sarrami, R. J. O'Reilly and A. Karton, Reaction barrier heights for cycloreversion of heterocyclic rings: An Achilles' heel for DFT and standard ab initio procedures, *Chem. Phys.*, 2015, **458**, 1-8.
- 5 A. Karton, R. J. O'Reilly, B. Chan and L. Radom, Determination of Barrier Heights for Proton Exchange in Small Water, Ammonia, and Hydrogen Fluoride Clusters with G4 (MP2)-Type, MP n, and SCS-MP n Procedures— A Caveat, *J. Chem. Theory Comput.*, 2012, **8**, 3128-3136.
- 6 B. Chan, A. T. Gilbert, P. M. Gill and L. Radom, Performance of density functional theory procedures for the calculation of proton-exchange barriers: Unusual behavior of M06-type functionals, *J. Chem. Theory Comput.*, 2014, **10**, 3777-3783.
- 7 A. Karton, R. J. O'Reilly and L. Radom, Assessment of theoretical procedures for calculating barrier heights for a diverse set of water-catalyzed proton-transfer reactions, *The Journal of Physical Chemistry A*, 2012, **116**, 4211-4221.
- 8 Y. Zhao, B. J. Lynch and D. G. Truhlar, Multi-coefficient extrapolated density functional theory for thermochemistry and thermochemical kinetics, *Physical Chemistry Chemical Physics*, 2005, **7**, 43-52.
- 9 Y. Zhao, N. González-García and D. G. Truhlar, Benchmark database of barrier heights for heavy atom transfer, nucleophilic substitution, association, and unimolecular reactions and its use to test theoretical methods, *The Journal of Physical Chemistry A*, 2005, **109**, 2012-2018.
- 10 R. Peverati and D. G. Truhlar, Quest for a universal density functional: the accuracy of density functionals across a broad spectrum of databases in chemistry and physics, *Philosophical Transactions of the Royal Society A: Mathematical, Physical and Engineering Sciences*, 2014, **372**, 20120476.
- 11 O. A. Vydrov and T. Van Voorhis, Benchmark assessment of the accuracy of several van der Waals density functionals, *J. Chem. Theory Comput.*, 2012, **8**, 1929-1934.

- 12 K. M. de Lange and J. R. Lane, Explicit correlation and intermolecular interactions: Investigating carbon dioxide complexes with the CCSD (T)-F12 method, *The Journal of Chemical Physics*, 2011, **134**.
- 13 J. D. McMahon and J. R. Lane, Explicit correlation and basis set superposition error: The structure and energy of carbon dioxide dimer, *The Journal of chemical physics*, 2011, **135**.
- 14 M. S. Marshall, L. A. Burns and C. D. Sherrill, Basis set convergence of the coupled-cluster correction,  $\delta$  MP2 CCSD (T): Best practices for benchmarking non-covalent interactions and the attendant revision of the S22, NBC10, HBC6, and HSG databases, *The Journal of chemical physics*, 2011, **135**, 194102.
- 15 K. T. Tang and J. P. Toennies, The van der Waals potentials between all the rare gas atoms from He to Rn, *The Journal of chemical physics*, 2003, **118**, 4976.
- 16 J. Witte, M. Goldey, J. B. Neaton and M. Head-Gordon, Beyond energies: Geometries of nonbonded molecular complexes as metrics for assessing electronic structure approaches, *J. Chem. Theory Comput.*, 2015, **11**, 1481-1492.
- 17 J. Rezac and P. Hobza, Describing noncovalent interactions beyond the common approximations: how accurate is the “gold standard,” CCSD (T) at the complete basis set limit?, *J. Chem. Theory Comput.*, 2013, **9**, 2151-2155.
- 18 A. Bauza, I. Alkorta, A. Frontera and J. Elguero, On the reliability of pure and hybrid DFT methods for the evaluation of halogen, chalcogen, and pnictogen bonds involving anionic and neutral electron donors, *J. Chem. Theory Comput.*, 2013, **9**, 5201-5210.
- 19 A. Otero-De-La-Roza, E. R. Johnson and G. A. DiLabio, Halogen bonding from dispersion-corrected density-functional theory: the role of delocalization error, *J. Chem. Theory Comput.*, 2014, **10**, 5436-5447.
- 20 D. L. Crittenden, A systematic CCSD (T) study of long-range and noncovalent interactions between benzene and a series of first- and second-row hydrides and rare gas atoms, *The Journal of Physical Chemistry A*, 2009, **113**, 1663-1669.
- 21 S. N. Steinmann, C. Piemontesi, A. Delachat and C. Corminboeuf, Why are the interaction energies of charge-transfer complexes challenging for DFT?, *J. Chem. Theory Comput.*, 2012, **8**, 1629-1640.
- 22 B. J. Mintz and J. M. Parks, Benchmark interaction energies for biologically relevant noncovalent complexes containing divalent sulfur, *The Journal of Physical Chemistry A*, 2012, **116**, 1086-1092.
- 23 K. U. Lao and J. M. Herbert, Accurate and efficient quantum chemistry calculations for noncovalent interactions in many-body systems: The XSAPT family of methods, *The Journal of Physical Chemistry A*, 2015, **119**, 235-252.

- 24 K. U. Lao and J. M. Herbert, An improved treatment of empirical dispersion and a many-body energy decomposition scheme for the explicit polarization plus symmetry-adapted perturbation theory (XSAPT) method, *The Journal of Chemical Physics*, 2013, **139**.
- 25 V. S. Bryantsev, M. S. Diallo, A. C. Van Duin and W. A. Goddard III, Evaluation of B3LYP, X3LYP, and M06-class density functionals for predicting the binding energies of neutral, protonated, and deprotonated water clusters, *J. Chem. Theory Comput.*, 2009, **5**, 1016-1026.
- 26 J. Rezac and P. Hobza, Advanced corrections of hydrogen bonding and dispersion for semiempirical quantum mechanical methods, *J. Chem. Theory Comput.*, 2012, **8**, 141-151.
- 27 K. L. Copeland and G. S. Tschumper, Hydrocarbon/water interactions: Encouraging energetics and structures from DFT but disconcerting discrepancies for Hessian indices, *J. Chem. Theory Comput.*, 2012, **8**, 1646-1656.
- 28 B. Temelso, K. A. Archer and G. C. Shields, Benchmark structures and binding energies of small water clusters with anharmonicity corrections, *The Journal of Physical Chemistry A*, 2011, **115**, 12034-12046.
- 29 N. Mardirossian, D. S. Lambrecht, L. McCaslin, S. S. Xantheas and M. Head-Gordon, The performance of density functionals for sulfate-water clusters, *J. Chem. Theory Comput.*, 2013, **9**, 1368-1380.
- 30 P. R. Tentscher and J. S. Arey, Binding in radical-solvent binary complexes: Benchmark energies and performance of approximate methods, *J. Chem. Theory Comput.*, 2013, **9**, 1568-1579.
- 31 J. Granatier, M. Pitonak and P. Hobza, Accuracy of several wave function and density functional theory methods for description of noncovalent interaction of saturated and unsaturated hydrocarbon dimers, *J. Chem. Theory Comput.*, 2012, **8**, 2282-2292.
- 32 A. D. Boese, Assessment of coupled cluster theory and more approximate methods for hydrogen bonded systems, *J. Chem. Theory Comput.*, 2013, **9**, 4403-4413.
- 33 A. D. Boese, Basis set limit coupled-cluster studies of hydrogen-bonded systems, *Mol. Phys.*, 2015, **113**, 1618-1629.
- 34 A. D. Boese, Density functional theory and hydrogen bonds: are we there yet?, *ChemPhysChem*, 2015, **16**, 978-985.
- 35 K. U. Lao, R. Schäffer, G. Jansen and J. M. Herbert, Accurate description of intermolecular interactions involving ions using symmetry-adapted perturbation theory, *J. Chem. Theory Comput.*, 2015, **11**, 2473-2486.
- 36 G. S. Fanourgakis, E. Apra and S. S. Xantheas, High-level ab initio calculations for the four low-lying families of minima of (H<sub>2</sub>O)<sub>20</sub>. I. Estimates of MP2/CBS binding energies and comparison with empirical potentials, *The Journal of chemical physics*, 2004, **121**, 2655-2663.
- 37 T. Anacker and J. Friedrich, New accurate benchmark energies for large water clusters: DFT is better than expected, *J. Comput. Chem.*, 2014, **35**, 634-643.

- 38 D. G. Smith, P. Jankowski, M. Slawik, H. A. Witek and K. Patkowski, Basis set convergence of the post-CCSD (T) contribution to noncovalent interaction energies, *J. Chem. Theory Comput.*, 2014, **10**, 3140-3150.
- 39 T. Schwabe, An isomeric reaction benchmark set to test if the performance of state-of-the-art density functionals can be regarded as independent of the external potential, *Physical Chemistry Chemical Physics*, 2014, **16**, 14559-14567.
- 40 A. Karton, D. Gruzman and J. M. Martin, Benchmark Thermochemistry of the C<sub>n</sub>H<sub>2n+2</sub> Alkane Isomers (n= 2– 8) and Performance of DFT and Composite Ab Initio Methods for Dispersion-Driven Isomeric Equilibria, *The Journal of Physical Chemistry A*, 2009, **113**, 8434-8447.
- 41 S. Kozuch, S. M. Bachrach and J. M. Martin, Conformational equilibria in butane-1, 4-diol: a benchmark of a prototypical system with strong intramolecular H-bonds, *The Journal of Physical Chemistry A*, 2014, **118**, 293-303.
- 42 L.-J. Yu and A. Karton, Assessment of theoretical procedures for a diverse set of isomerization reactions involving double-bond migration in conjugated dienes, *Chem. Phys.*, 2014, **441**, 166-177.
- 43 L.-J. Yu, F. Sarrami, A. Karton and R. J. O'Reilly, An assessment of theoretical procedures for  $\pi$ -conjugation stabilisation energies in enones, *Mol. Phys.*, 2015, **113**, 1284-1296.
- 44 D. Gruzman, A. Karton and J. M. Martin, Performance of ab initio and density functional methods for conformational equilibria of C<sub>n</sub>H<sub>2n+2</sub> alkane isomers (n= 4– 8), *The Journal of Physical Chemistry A*, 2009, **113**, 11974-11983.
- 45 J. J. Wilke, M. C. Lind, H. F. Schaefer III, A. G. Császár and W. D. Allen, Conformers of gaseous cysteine, *J. Chem. Theory Comput.*, 2009, **5**, 1511-1523.
- 46 J. M. Martin, What can we learn about dispersion from the conformer surface of n-pentane?, *The Journal of Physical Chemistry A*, 2013, **117**, 3118-3132.
- 47 S. Yoo, E. Apra, X. C. Zeng and S. S. Xantheas, High-level ab initio electronic structure calculations of water clusters (H<sub>2</sub>O)<sub>16</sub> and (H<sub>2</sub>O)<sub>17</sub>: A new global minimum for (H<sub>2</sub>O)<sub>16</sub>, *The Journal of Physical Chemistry Letters*, 2010, **1**, 3122-3127.
- 48 L. A. Curtiss, K. Raghavachari, G. W. Trucks and J. A. Pople, Gaussian-2 theory for molecular energies of first-and second-row compounds, *The Journal of chemical physics*, 1991, **94**, 7221-7230.
- 49 S. Grimme, H. Kruse, L. Goerigk and G. Erker, The mechanism of dihydrogen activation by frustrated Lewis pairs revisited, *Angew. Chem. Int. Ed.*, 2010, **49**, 1402-1405.

- 50 L. Goerigk and S. Grimme, Efficient and Accurate Double-Hybrid-Meta-GGA Density Functionals Evaluation with the Extended GMTKN30 Database for General Main Group Thermochemistry, Kinetics, and Noncovalent Interactions, *J. Chem. Theory Comput.*, 2011, **7**, 291-309.
- 51 H. Krieg and S. Grimme, Thermochemical benchmarking of hydrocarbon bond separation reaction energies: Jacob's ladder is not reversed!, *Mol. Phys.*, 2010, **108**, 2655-2666.
- 52 R. J. O'Reilly and A. Karton, A dataset of highly accurate homolytic N-Br bond dissociation energies obtained by Means of W2 theory, *Int. J. Quantum Chem.*, 2016, **116**, 52-60.
- 53 A. Karton, P. R. Schreiner and J. M. Martin, Heats of formation of platonic hydrocarbon cages by means of high-level thermochemical procedures, *J. Comput. Chem.*, 2016, **37**, 49-58.
- 54 H. Yu and D. G. Truhlar, Components of the bond energy in polar diatomic molecules, radicals, and ions formed by group-1 and group-2 metal atoms, *J. Chem. Theory Comput.*, 2015, **11**, 2968-2983.
- 55 W. Zhang, D. G. Truhlar and M. Tang, Tests of exchange-correlation functional approximations against reliable experimental data for average bond energies of 3d transition metal compounds, *J. Chem. Theory Comput.*, 2013, **9**, 3965-3977.
- 56 B. B. Averkiev, Y. Zhao and D. G. Truhlar, Binding energy of d10 transition metals to alkenes by wave function theory and density functional theory, *J. Mol. Catal. A: Chem.*, 2010, **324**, 80-88.
- 57 X. Xu, W. Zhang, M. Tang and D. G. Truhlar, Do practical standard coupled cluster calculations agree better than Kohn-Sham calculations with currently available functionals when compared to the best available experimental data for dissociation energies of bonds to 3 d transition metals?, *J. Chem. Theory Comput.*, 2015, **11**, 2036-2052.
- 58 C. E. Hoyer, G. L. Manni, D. G. Truhlar and L. Gagliardi, Controversial electronic structures and energies of Fe2, Fe2+, and Fe2- resolved by RASPT2 calculations, *The Journal of Chemical Physics*, 2014, **141**.
- 59 S. Luo, B. Averkiev, K. R. Yang, X. Xu and D. G. Truhlar, Density functional theory of open-shell systems. the 3d-series transition-metal atoms and their cations, *J. Chem. Theory Comput.*, 2014, **10**, 102-121.
- 60 National Institute of Standards and Technology (<http://webbook.nist.gov/cgi/cbook.cgi?ID=C7446119&Units=SI>).
- 61 National Institute of Standards and Technology (<http://webbook.nist.gov/cgi/cbook.cgi?ID=C63344865&Units=SI>).
- 62 National Institute of Standards and Technology Chemistry WebBook. (<http://webbook.nist.gov/cgi/cbook.cgi?ID=C7664939&Units=SI&Mask=1#Thermo-Gas>).

- 63 S. Luo and D. G. Truhlar, How evenly can approximate density functionals treat the different multiplicities and ionization states of 4d transition metal atoms?, *J. Chem. Theory Comput.*, 2012, **8**, 4112-4126.
- 64 K. Yang, R. Peverati, D. G. Truhlar and R. Valero, Density functional study of multiplicity-changing valence and Rydberg excitations of p-block elements: Delta self-consistent field, collinear spin-flip time-dependent density functional theory (DFT), and conventional time-dependent DFT, *The Journal of chemical physics*, 2011, **135**.
- 65 J. Zheng, Y. Zhao and D. G. Truhlar, Representative benchmark suites for barrier heights of diverse reaction types and assessment of electronic structure methods for thermochemical kinetics, *J. Chem. Theory Comput.*, 2007, **3**, 569-582.
- 66 A. Karton, A. Tarnopolsky, J.-F. Lamère, G. C. Schatz and J. M. Martin, Highly accurate first-principles benchmark data sets for the parametrization and validation of density functional and other approximate methods. Derivation of a robust, generally applicable, double-hybrid functional for thermochemistry and thermochemical kinetics, *The Journal of Physical Chemistry A*, 2008, **112**, 12868-12886.
- 67 J. P. Perdew, K. Burke and M. Ernzerhof, Generalized gradient approximation made simple, *Phys. Rev. Lett.*, 1996, **77**, 3865.
- 68 S. Grimme, S. Ehrlich and L. Goerigk, Effect of the damping function in dispersion corrected density functional theory, *J. Comput. Chem.*, 2011, **32**, 1456-1465.
- 69 J. Tao, J. P. Perdew, V. N. Staroverov and G. E. Scuseria, Climbing the density functional ladder: Nonempirical meta-generalized gradient approximation designed for molecules and solids, *Phys. Rev. Lett.*, 2003, **91**, 146401.
- 70 Y. Zhao and D. G. Truhlar, A new local density functional for main-group thermochemistry, transition metal bonding, thermochemical kinetics, and noncovalent interactions, *The Journal of chemical physics*, 2006, **125**.
- 71 L. Goerigk and S. Grimme, A thorough benchmark of density functional methods for general main group thermochemistry, kinetics, and noncovalent interactions, *Physical Chemistry Chemical Physics*, 2011, **13**, 6670-6688.
- 72 H. S. Yu, X. He and D. G. Truhlar, MN15-L: A new local exchange-correlation functional for Kohn-Sham density functional theory with broad accuracy for atoms, molecules, and solids, *J. Chem. Theory Comput.*, 2016, **12**, 1280-1293.
- 73 Y. Wang, X. Jin, H. S. Yu, D. G. Truhlar and X. He, Revised M06-L functional for improved accuracy on chemical reaction barrier heights, noncovalent interactions, and solid-state physics, *Proceedings of the National Academy of Sciences*, 2017, **114**, 8487-8492.
- 74 J. Sun, A. Ruzsinszky and J. P. Perdew, Strongly constrained and appropriately normed semilocal density functional, *Phys. Rev. Lett.*, 2015, **115**, 036402.

- 75 J. Brandenburg, J. Bates, J. Sun and J. Perdew, Benchmark tests of a strongly constrained semilocal functional with a long-range dispersion correction, *Physical Review B*, 2016, **94**, 115144.
- 76 J. W. Furness, A. D. Kaplan, J. Ning, J. P. Perdew and J. Sun, Accurate and numerically efficient r2SCAN meta-generalized gradient approximation, *The journal of physical chemistry letters*, 2020, **11**, 8208-8215.
- 77 S. Grimme, A. Hansen, S. Ehlert and J.-M. Mewes, r2SCAN-3c: A “Swiss army knife” composite electronic-structure method, *The Journal of Chemical Physics*, 2021, **154**.
- 78 E. Caldeweyher, S. Ehlert, A. Hansen, H. Neugebauer, S. Spicher, C. Bannwarth and S. Grimme, A generally applicable atomic-charge dependent London dispersion correction, *The Journal of chemical physics*, 2019, **150**.
- 79 J.-D. Chai and M. Head-Gordon, Long-range corrected hybrid density functionals with damped atom–atom dispersion corrections, *Physical Chemistry Chemical Physics*, 2008, **10**, 6615-6620.
- 80 S. Grimme, Semiempirical GGA-type density functional constructed with a long-range dispersion correction, *J. Comput. Chem.*, 2006, **27**, 1787-1799.
- 81 R. Peverati and D. G. Truhlar, Improving the accuracy of hybrid meta-GGA density functionals by range separation, *The Journal of Physical Chemistry Letters*, 2011, **2**, 2810-2817.
- 82 L. Goerigk, Treating London-dispersion effects with the latest Minnesota density functionals: problems and possible solutions, *The journal of physical chemistry letters*, 2015, **6**, 3891-3896.
- 83 P. Verma, Y. Wang, S. Ghosh, X. He and D. G. Truhlar, Revised M11 exchange-correlation functional for electronic excitation energies and ground-state properties, *The Journal of Physical Chemistry A*, 2019, **123**, 2966-2990.
- 84 P. Verma, B. G. Janesko, Y. Wang, X. He, G. Scalmani, M. J. Frisch and D. G. Truhlar, M11plus: A range-separated hybrid meta functional with both local and rung-3.5 correlation terms and high across-the-board accuracy for chemical applications, *J. Chem. Theory Comput.*, 2019, **15**, 4804-4815.
- 85 N. Mardirossian and M. Head-Gordon,  $\omega$ B97X-V: A 10-parameter, range-separated hybrid, generalized gradient approximation density functional with nonlocal correlation, designed by a survival-of-the-fittest strategy, *Physical Chemistry Chemical Physics*, 2014, **16**, 9904-9924.
- 86 N. Mardirossian and M. Head-Gordon,  $\omega$ B97M-V: A combinatorially optimized, range-separated hybrid, meta-GGA density functional with VV10 nonlocal correlation, *The Journal of chemical physics*, 2016, **144**.

- 87 Y. Wang, P. Verma, L. Zhang, Y. Li, Z. Liu, D. G. Truhlar and X. He, M06-SX screened-exchange density functional for chemistry and solid-state physics, *Proceedings of the National Academy of Sciences*, 2020, **117**, 2294-2301.
- 88 J. Kirkpatrick, B. McMorrow, D. H. Turban, A. L. Gaunt, J. S. Spencer, A. G. Matthews, A. Obika, L. Thiry, M. Fortunato and D. Pfau, Pushing the frontiers of density functionals by solving the fractional electron problem, *Science*, 2021, **374**, 1385-1389.
- 89 A. D. Becke, Density-functional thermochemistry. III. The role of exact exchange, *The Journal of chemical physics*, 1993, **98**, 5648-5652.
- 90 P. J. Stephens, F. J. Devlin, C. F. Chabalowski and M. J. Frisch, Ab initio calculation of vibrational absorption and circular dichroism spectra using density functional force fields, *The Journal of physical chemistry*, 1994, **98**, 11623-11627.
- 91 M. Ernzerhof and G. E. Scuseria, Assessment of the Perdew–Burke–Ernzerhof exchange-correlation functional, *The Journal of chemical physics*, 1999, **110**, 5029-5036.
- 92 C. Adamo and V. Barone, Toward reliable density functional methods without adjustable parameters: The PBE0 model, *The Journal of chemical physics*, 1999, **110**, 6158-6170.
- 93 Y. Zhao, N. E. Schultz and D. G. Truhlar, Design of density functionals by combining the method of constraint satisfaction with parametrization for thermochemistry, thermochemical kinetics, and noncovalent interactions, *J. Chem. Theory Comput.*, 2006, **2**, 364-382.
- 94 Y. Zhao and D. G. Truhlar, Design of density functionals that are broadly accurate for thermochemistry, thermochemical kinetics, and nonbonded interactions, *The Journal of Physical Chemistry A*, 2005, **109**, 5656-5667.
- 95 Y. Zhao and D. G. Truhlar, The M06 suite of density functionals for main group thermochemistry, thermochemical kinetics, noncovalent interactions, excited states, and transition elements: two new functionals and systematic testing of four M06-class functionals and 12 other functionals, *Theor. Chem. Acc.*, 2008, **120**, 215-241.
- 96 Y. Zhao and D. G. Truhlar, Exploring the limit of accuracy of the global hybrid meta density functional for main-group thermochemistry, kinetics, and noncovalent interactions, *J. Chem. Theory Comput.*, 2008, **4**, 1849-1868.
- 97 H. S. Yu, X. He, S. L. Li and D. G. Truhlar, MN15: A Kohn-Sham global-hybrid exchange-correlation density functional with broad accuracy for multi-reference and single-reference systems and noncovalent interactions (vol 7, pg 6278, 2016), *Chem. Sci.*, 2016, **7**, 6278-6279.
- 98 Y. Wang, P. Verma, X. Jin, D. G. Truhlar and X. He, Revised M06 density functional for main-group and transition-metal chemistry, *Proceedings of the National Academy of Sciences*, 2018, **115**, 10257-10262.
- 99 Y. Liu, C. Zhang, Z. Liu, D. G. Truhlar, Y. Wang and X. He, Supervised learning of a chemistry functional with damped dispersion, *Nat. Comput. Sci.*, 2023, **3**, 48-58.

- 100 S. Grimme, J. Antony, S. Ehrlich and H. Krieg, A consistent and accurate ab initio parametrization of density functional dispersion correction (DFT-D) for the 94 elements H-Pu, *The Journal of chemical physics*, 2010, **132**.
- 101 S. Kozuch, D. Gruzman and J. M. Martin, DSD-BLYP: A general purpose double hybrid density functional including spin component scaling and dispersion correction, *The Journal of Physical Chemistry C*, 2010, **114**, 20801-20808.
- 102 S. Grimme, Semiempirical hybrid density functional with perturbative second-order correlation, *The Journal of chemical physics*, 2006, **124**.
- 103 L. Goerigk, A. Hansen, C. Bauer, S. Ehrlich, A. Najibi and S. Grimme, A look at the density functional theory zoo with the advanced GMTKN55 database for general main group thermochemistry, kinetics and noncovalent interactions, *Physical Chemistry Chemical Physics*, 2017, **19**, 32184-32215.
- 104 T. Schwabe and S. Grimme, Towards chemical accuracy for the thermodynamics of large molecules: new hybrid density functionals including non-local correlation effects, *Physical Chemistry Chemical Physics*, 2006, **8**, 4398-4401.
